# Supplementary material for: Vibrational mode tailoring approach: an efficient route to compute anharmonic molecular vibrations of large molecules
Source: Royal Society of Chemistry journal article supplement (doi:10.1039/d4cp02812k), 2024-01-01
Supplement: d4cp02812k1.pdf [file d4cp02812k1.pdf]

# **Vibrational mode Tailoring Approach: An Efficient Route to Compute Anharmonic Molecular Vibrations of Large Molecules**

*Hrishit Mitra<sup>†</sup>, Dhiksha Sharma<sup>†</sup> and Tapta Kanchan Roy<sup>\*</sup>*

Department of Chemistry and Chemical Sciences,

Central University of Jammu, Rahya-Suchani (Bagla), Jammu, J&K, 181143 India

email: *tapta.che@cujammu.ac.in*

<sup>†</sup>both the authors have equal contribution

| Contents                                                                                                                                                                                                                                                                                                                                    | Page           |
|---------------------------------------------------------------------------------------------------------------------------------------------------------------------------------------------------------------------------------------------------------------------------------------------------------------------------------------------|----------------|
| <b>Figure S1.</b> Pictorial representation of peripheral/terminal atoms for butanol and NATA molecules                                                                                                                                                                                                                                      | <b>S4</b>      |
| <b>Table S1.</b> Calculation of normal mode displacements with examples                                                                                                                                                                                                                                                                     | <b>S5-S6</b>   |
| <b>Figure S2.</b> Histogram for the population/distribution of normal modes following their coupling strengths                                                                                                                                                                                                                              | <b>S7</b>      |
| <b>Figure S3.</b> Some selected normal mode of vibrations of butanol                                                                                                                                                                                                                                                                        | <b>S8</b>      |
| <b>Figure S4.</b> Relation of anharmonic correction and relative coupling with respect to OH stretching mode for Butanol                                                                                                                                                                                                                    | <b>S9</b>      |
| <b>Table S2.</b> Change in O-H stretching frequency of Butanol during sequential addition of rest of the modes.                                                                                                                                                                                                                             | <b>S10</b>     |
| <b>Figure S5.</b> Effects of the addition of sequential normal modes (in descending order) on the O-H stretching ( $\nu_{39}$ ) of butanol                                                                                                                                                                                                  | <b>S11</b>     |
| <b>Table S3.</b> Comparisons of computed anharmonic frequencies (in $\text{cm}^{-1}$ ) and intensities ( $\text{km mol}^{-1}$ ) of different VTA guided PESs considering various set of normal modes of butanol.                                                                                                                            | <b>S12</b>     |
| Figure S6. Qualitative comparison of relative coupling strength ( $\xi_R$ ) and relative atomic displacement ( $q_R$ ) for O-H stretching of butanol.                                                                                                                                                                                       | <b>S13</b>     |
| <b>Figure S7.</b> Normal mode analysis of O-H bending (Mode <b>18</b> ) of butanol.                                                                                                                                                                                                                                                         | <b>S14</b>     |
| <b>Table S4.</b> Individual coupling ( $\xi$ ) and relative coupling ( $\xi_R$ ) strength of O-H in plane bending ( $\xi_{18}$ ) with rest of the normal modes along with anharmonic corrections ( $\Delta\nu = \nu_{\text{diagonal}} - \nu_{\text{VSCF-PT2}}$ in $\text{cm}^{-1}$ ) for butanol.                                           | <b>S15</b>     |
| <b>Table S5.</b> Individual coupling ( $\xi$ ) and relative coupling ( $\xi_R$ ) strength of $\text{CH}_3$ stretching ( $\xi_{37}$ ) with rest of the normal modes along with anharmonic corrections ( $\Delta\nu = \nu_{\text{diagonal}} - \nu_{\text{VSCF-PT2}}$ in $\text{cm}^{-1}$ ) for butanol.                                       | <b>S16</b>     |
| <b>Table S6.</b> Individual coupling ( $\xi$ ) and relative coupling ( $\xi_R$ ) strength of C-H bending ( $\xi_{27}$ ) with rest of the normal modes along with anharmonic corrections ( $\Delta\nu = \nu_{\text{diagonal}} - \nu_{\text{VSCF-PT2}}$ in $\text{cm}^{-1}$ ) for butanol.                                                    | <b>S17</b>     |
| <b>Figure S8.</b> Normal mode analysis of $\text{CH}_3$ bending (Mode <b>27</b> ) of butanol                                                                                                                                                                                                                                                | <b>S18</b>     |
| <b>Table S7.</b> Comparative study of different relative coupling ( $\xi_R$ ) values for Mode <b>39</b> (O-H stretching), Mode <b>18</b> (O-H bending), Mode <b>37</b> ( $\text{CH}_3$ stretching) and Mode <b>27</b> ( $\text{CH}_3$ bending) of Butanol. Some selected normal modes of different relative coupling values are considered. | <b>S19</b>     |
| <b>Table S8.</b> Individual ( $\xi$ ) and relative coupling ( $\xi_R$ ) strengths for mode <b>92</b> with rest of the normal modes of NATA                                                                                                                                                                                                  | <b>S20</b>     |
| <b>Table S9.</b> Individual ( $\xi$ ) and relative ( $\xi_R$ ) coupling strength of Symmetric-NH stretching ( $\xi_{90}$ ) with rest of the normal modes for NATA molecule.                                                                                                                                                                 | <b>S21</b>     |
| <b>Table S10.</b> Individual ( $\xi$ ) and relative ( $\xi_R$ ) coupling strength of $\phi$ N-H stretching ( $\xi_{91}$ ) with rest of the normal modes for NATA molecule.                                                                                                                                                                  | <b>S22</b>     |
| <b>Table S11.</b> Individual ( $\xi$ ) and relative ( $\xi_R$ ) coupling strength of Indole N-H stretching ( $\xi_{93}$ ) with rest of the normal modes for NATA molecule.                                                                                                                                                                  | <b>S23</b>     |
| <b>Table S12.</b> Individual ( $\xi$ ) and relative ( $\xi_R$ ) coupling strength of C=O stretching ( $\xi_{78}$ ) with rest of the normal modes for NATA molecule.                                                                                                                                                                         | <b>S24</b>     |
| <b>Table S13.</b> Comparative study of $\xi_{\text{max}}$ for selected N-H stretching, N-H bending and C=O stretching for NATA.                                                                                                                                                                                                             | <b>S25</b>     |
| <b>Table S14.</b> Individual ( $\xi$ ) and relative ( $\xi_R$ ) coupling strength of $\text{NH}_2$ bending ( $\xi_{51}$ ) with rest of the normal modes for NATA molecule.                                                                                                                                                                  | <b>S26</b>     |
| <b>Table S15.</b> Comparisons of computed anharmonic frequencies (in $\text{cm}^{-1}$ ) and intensities ( $\text{km mol}^{-1}$ ) of different VTA guided PESs considering various set of normal modes of NATA molecule.                                                                                                                     | <b>S27-S28</b> |

|                                                                                                                                                                                                                                                                                                                                                                                                                                                 |                       |
|-------------------------------------------------------------------------------------------------------------------------------------------------------------------------------------------------------------------------------------------------------------------------------------------------------------------------------------------------------------------------------------------------------------------------------------------------|-----------------------|
| <p><b>Figure S9.</b> Normal mode analysis of NATA for</p> <ul style="list-style-type: none"> <li>a. Anti-symmetric NH<sub>2</sub> stretching (Mode <b>92</b>)</li> <li>b. Indole N-H stretching (Mode <b>93</b>)</li> <li>c. C=O stretching (Mode <b>78</b>)</li> <li>d. NH<sub>2</sub> bending (Mode <b>51</b>)</li> <li>e. Symmetric-N-H stretching (Mode <b>90</b>)</li> <li>f. <math>\phi</math> N-H stretching (Mode <b>91</b>)</li> </ul> | <p><b>S29-S34</b></p> |
|-------------------------------------------------------------------------------------------------------------------------------------------------------------------------------------------------------------------------------------------------------------------------------------------------------------------------------------------------------------------------------------------------------------------------------------------------|-----------------------|

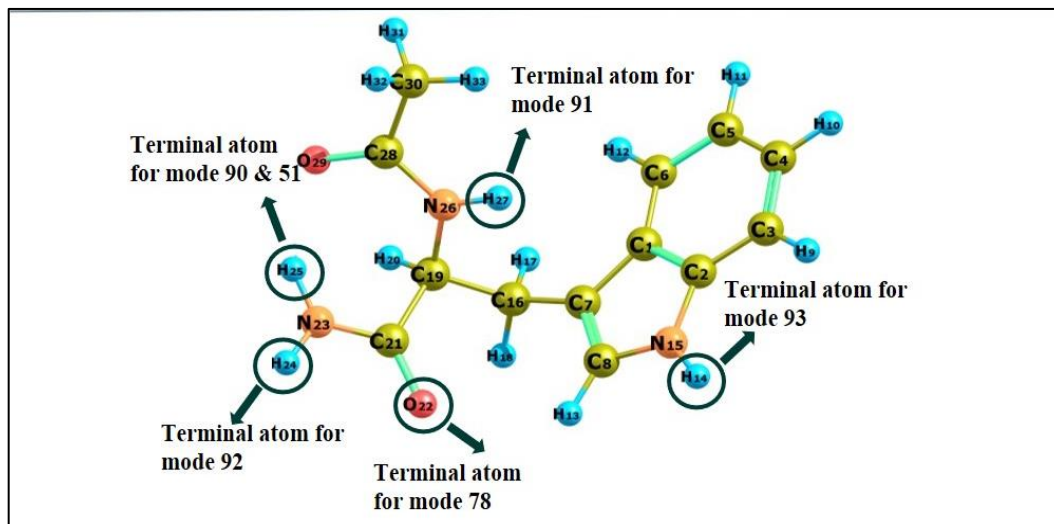

**Fig. S1.** Pictorial representation of terminal atom encircled for each target mode considered for normal mode analysis: upper panel: butanol and lower panel: NATA.

## Calculations of Atomic Mode displacements

We assessed the displacements of target atoms in target normal modes of vibration along with other modes. For a system of  $m$  atoms with  $N$  vibrational modes, target mode ( $t$ ) is the mode of interest. To calculate the atomic displacements for a target mode, we mainly focused on the terminal atom and its displacements in different vibrational modes which are coupled with the target mode in different extent. Here, the terminal atom (which is also a target atom) is the one which is connected to other atom only from one side (by single, double bonds, etc.). The component of the atomic displacement vector of atom  $a$  for mode  $i$  (represented as  $q_a^i$ ) is calculated, focusing mostly on the terminal atom(s) of the target modes as

$$q_a^i = \sqrt{\Delta X_a^2 + \Delta Y_a^2 + \Delta Z_a^2} \quad (1)$$

Here,  $\Delta X_a$ ,  $\Delta Y_a$ , and  $\Delta Z_a$ , are atomic displacements with the unit of length (Å) for  $i^{\text{th}}$  mode, along  $x$ ,  $y$ , and  $z$  axes from the equilibrium position, respectively. Relative atomic displacements ( $q_R$ ) of an  $a^{\text{th}}$  atom for  $i^{\text{th}}$  mode is then calculated with respect to displacements of same atom for the target mode as,

$$q_R = q_a^i / q_a^t \quad (2)$$

Since  $q_R$  is ratio of atomic displacements for two different modes, it is technically a unitless quantity. It is aimed to analyse the position of the terminal atom/target atom in various vibrational modes and its comparison with that of target mode.

**Table S1a.** Calculations of atomic mode displacements for target mode **39** for butanol

| Atoms(a) | $\Delta X$  | $\Delta Y$  | $\Delta Z$  | $q_a^i = \sqrt{\Delta X_a^2 + \Delta Y_a^2 + \Delta Z_a^2}$ |
|----------|-------------|-------------|-------------|-------------------------------------------------------------|
| C1       | -0.00002446 | 0.00004225  | 0.00000000  | 0.00                                                        |
| H2       | 0.00011600  | -0.00026649 | 0.00000000  | 0.00                                                        |
| H3       | 0.00000596  | 0.00002860  | -0.00000266 | 0.00                                                        |
| H4       | 0.00000595  | 0.00002859  | 0.00000266  | 0.00                                                        |
| C5       | 0.00005011  | -0.00016354 | 0.00000000  | 0.00                                                        |
| H6       | -0.00011587 | 0.00040497  | 0.00046602  | 0.00                                                        |
| H7       | -0.00011585 | 0.00040501  | -0.00046605 | 0.00                                                        |
| C8       | -0.00001257 | 0.00035821  | 0.00000000  | 0.00                                                        |
| H9       | 0.00068062  | 0.00024315  | -0.00048906 | 0.00                                                        |
| H10      | 0.00068063  | 0.00024313  | 0.00048904  | 0.00                                                        |
| C11      | -0.00015174 | -0.00192316 | 0.00000000  | 0.00                                                        |
| H12      | 0.00258304  | -0.00117432 | 0.00069445  | 0.00                                                        |
| H13      | 0.00258306  | -0.00117428 | -0.00069452 | 0.00                                                        |
| O14      | -0.05518561 | -0.02502507 | 0.00000000  | 0.06                                                        |
| H15      | 0.87106296  | 0.41850540  | -0.00000001 | 0.97                                                        |

**Table S1b.** Actual and normalized normal mode displacement for strongly/moderately coupled modes ( $\xi_R \sim >0.2$ ) with respect to OH stretching mode (target mode) for butanol molecule

| Actual normal mode displacement ( $q_a^i$ )   |         |         |         |        |        |        |
|-----------------------------------------------|---------|---------|---------|--------|--------|--------|
| Atom                                          | Mode 39 | Mode 18 | Mode 13 | Mode 5 | Mode 3 | Mode 1 |
| <b>O14</b>                                    | 0.06    | 0.04    | 0.12    | 0.06   | 0.12   | 0.00   |
| <b>H15</b>                                    | 0.97    | 0.61    | 0.21    | 0.95   | 0.21   | 0.15   |
| Normalized normal mode displacement ( $q_R$ ) |         |         |         |        |        |        |
| Atom                                          | Mode 39 | Mode 18 | Mode 13 | Mode 5 | Mode 3 | Mode 1 |
| <b>O14</b>                                    | 1.0     | 0.6     | 1.9     | 0.9    | 2.0    | 0.1    |
| <b>H15</b>                                    | 1.0     | 0.6     | 0.2     | 1.0    | 0.2    | 0.2    |

One of the target modes for butanol which is studied is mode **39** i.e., O-H stretching where the terminal atom is H15 which shows the maximum displacement in this vibration. To explain a specific instance, the last row of table S1 shows the displacement of H15 atom from the equilibrium position along x, y and z axes respectively. Following that atomic mode displacement, say,  $q_{H15}^{39}$  is calculated in unit of length (Å) following eq.1 for H15 atom of mode **39** such that,

$$q_{H15}^{39} = \sqrt{\Delta X_{H15}^2 + \Delta Y_{H15}^2 + \Delta Z_{H15}^2}$$

$$q_{H15}^{39} = \sqrt{(0.87106296)^2 + (0.41850540)^2 + (-0.00000001)^2}$$

$$q_{H15}^{39} = 0.97$$

To assess the position of terminal atom in other modes with respect to the target mode, relative atomic mode displacement ' $q_R$ ' is calculated. For that, atomic mode displacements of terminal atom in different modes is required as shown in Table S1b. For illustration,  $q_R$  of H15 for mode **5** can be calculated by normalising its displacement with that of H15 in the target mode as,

$$q_R = \frac{q_{H15}^5}{q_{H15}^{39}}$$

$$q_R = \frac{0.95}{0.97}$$

$q_R = 0.979$  and can be calculated similarly for other modes as well.

## Categorisation of relative coupling strength ( $\xi$ )

We have considered the pair-wise couplings ( $\xi$ ) of the target mode with the rest of the modes one at a time followed by the computation of the VSCF-PT2. That brings 38 different values of  $\xi_R$  which are then compared with the full potential as well as intrinsic anharmonicities. The magnitudes of the individual  $\xi$  are different for different pair-wise couplings and the relative coupling values ( $\xi_R$ ) are distributed from 0.0 to 1.0. For comprehensive categorization of  $\xi_R$  values for the strongly, moderately, and weakly coupled modes, we have computed a set of 2,016 different  $\xi_R$  values for two molecules, butanol, and NATA molecules. The histogram as given below clearly shows the characteristic distribution pattern of  $\xi_R$ . Majority of the  $\xi_R$  values are very small and fall in the range of 0.0 to 0.1 (~68%). The second most populated range is 0.2 to 1.0 (~18%). For rest of the cases, the population of vibrational modes decrease systematically with the increase of  $\xi_R$ . A small increase in population with  $\xi_R$  from 0.9 to 1.0 shows that for each target mode, a group of other modes are always present with very strong mutual coupling. Following this observation, the  $\xi_R$  is duly categorized in three different segments: strong ( $1.0 \geq \xi_R \geq 0.2$ ), moderate ( $0.1 \leq \xi_R \leq 0.2$ ) and weak ( $\xi_R \leq 0.1$ ). This classification is followed throughout this work unless it is specified.

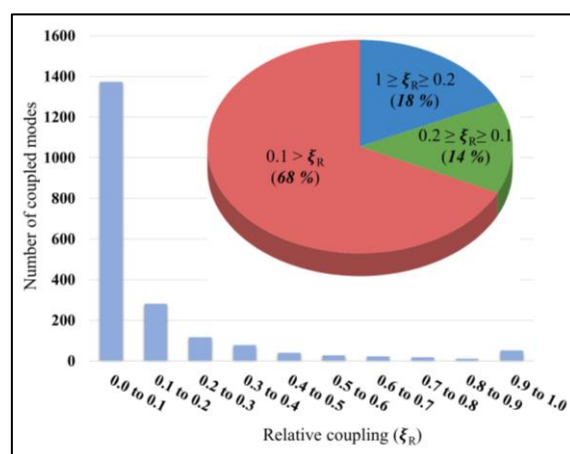

**Fig. S2.** Histogram for the population/distribution of normal modes following their coupling strengths considering 2016 number of  $\xi_R$  values of butanol and NATA molecules. The pie-chart represents the categorization of strongly, moderately, and weakly coupled modes.

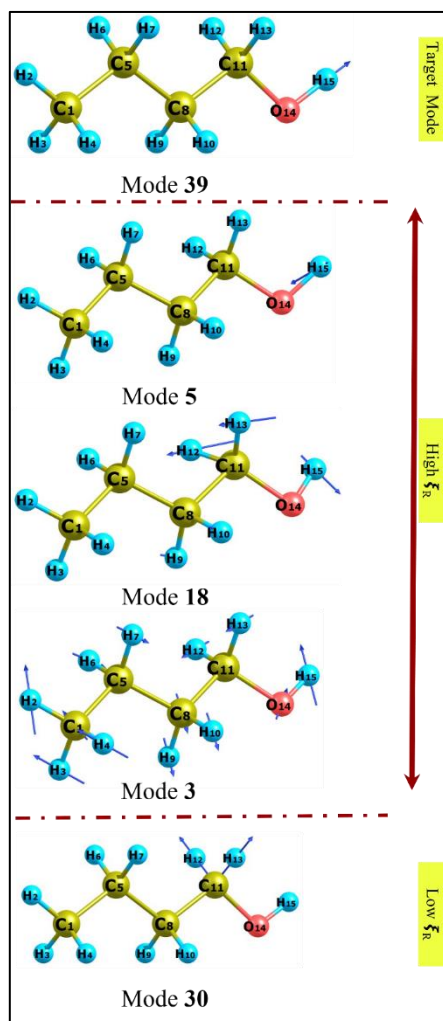

**Fig S3.** Some selected normal mode of vibrations of butanol. The top panel represents the target mode. Middle and bottom panels represent the strongly and weakly coupled modes, respectively.



## Relation between Anharmonic correction and Relative coupling

Below we have plotted the anharmonic corrections due to pure pair wise coupling on top of intrinsic anharmonic values against the  $\xi_R$  following the data given in table the main manuscript. A near linear relation is found for  $\Delta v$  against  $\xi_R$  for majority of the cases with some exceptions. It is observed that for some cases high  $\xi_R$  gives comparatively less/high  $\Delta v$  ( $v_{\text{diagonal}} - v_{\text{VSCF-PT2}}$ ) values and sometimes also show blue shifts. Vibrational modes are unique in a sense that for a particular mode, it can vary from one system to another following the topology of the molecular system and the vibrational modes involved in it. Consequently, the extent of coupling, corresponding magnitude, and the direction (red/blue shift) of corrections can vary system to system. However, the overall effect is generally found red shifted towards the converged values. Next, we turn to check the types of modes with different extent of  $\xi$  and  $\xi_R$  with respect to mode **39**. Mode **5**, corresponds to highest  $\xi$  value (so,  $\xi_R = 1$ ), is O14-H15 bending mode which leads to noticeable  $\sim 22 \text{ cm}^{-1}$  red shift. Mode **3** (torsion,  $\xi_R = 0.22$ ) and **18** (O14-H15 in plane bending + C11-H12H13 bending,  $\xi_R = 0.38$ ) also involve displacements of O14-H15 moiety and strongly coupled with O14-H15 stretching resulting in  $\sim 2.7$  and  $\sim 10.5 \text{ cm}^{-1}$  red shifts, respectively. The other 2 strongly/moderately coupled modes i.e., **1** (torsion,  $\xi_R = 0.4$ ) and **13** (O14-H15 bending +  $\text{CH}_2$  bending,  $\xi_R = 0.19$ ) result in  $\sim 4\text{-}6 \text{ cm}^{-1}$  red shift. For all these cases, atomic displacement of O-H moiety is found significant. For example,  $q$  and  $q_R$  for mode **5** are 0.95 and 0.98 and for mode **18**, these are 0.61 and 0.63, respectively. That shows that analysis of  $q$  and  $q_R$  can offer an efficient protocol to sample a set of important normal modes for a target mode without calculating the full pair-wise PES. Next, the 6 moderately coupled modes mostly involve the bending of this O-H moiety mixed with bending of carbon chain or adjacent  $-\text{CH}_2$  groups. These observations also indicate that O-H stretching is mostly a local mode. Rest of the modes are found to be weakly coupled to very weakly coupled and attenuate to  $q \approx 0$  with the increase in distance from the target mode (**39**), for which the  $\xi$  values are also found very small or close to zero. Overall, it is observed that normal modes corresponding to different types of O-H vibrations are significantly coupled with O-H stretching.

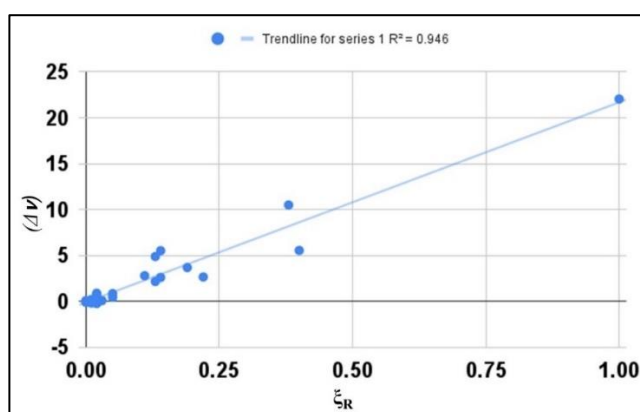

**Fig S4.** Relation of anharmonic correction and relative coupling with respect to OH stretching mode (mode **39**) for Butanol.

**Table S2.** Change in O-H stretching frequency ( $\nu_{\text{diagonal}} - \nu_{\text{VSCF-PT2}}$ ) of Butanol due to pairwise coupling following sequential addition of rest of the modes.

| Description  | O-H str. freq. (cm <sup>-1</sup> ) | Description | O-H str. freq. (cm <sup>-1</sup> ) |
|--------------|------------------------------------|-------------|------------------------------------|
| v39          | 3664                               | v39,,,,,19  | 3653                               |
| v39,38       | 3664                               | v39,,,,,18  | 3642                               |
| v39,38,37    | 3664                               | v39,,,,,17  | 3642                               |
| v39,38,37,36 | 3664                               | v39,,,,,16  | 3642                               |
| v39,,,,,35   | 3664                               | v39,,,,,15  | 3639                               |
| v39,,,,,34   | 3664                               | v39,,,,,14  | 3639                               |
| v39,,,,,33   | 3664                               | v39,,,,,13  | 3634                               |
| v39,,,,,32   | 3664                               | v39,,,,,12  | 3631                               |
| v39,,,,,31   | 3664                               | v39,,,,,11  | 3632                               |
| v39,,,,,30   | 3665                               | v39,,,,,10  | 3630                               |
| v39,,,,,29   | 3665                               | v39,,,,,9   | 3630                               |
| v39,,,,,28   | 3665                               | v39,,,,,8   | 3630                               |
| v39,,,,,27   | 3665                               | v39,,,,,7   | 3628                               |
| v39,,,,,26   | 3665                               | v39,,,,,6   | 3628                               |
| v39,,,,,25   | 3665                               | v39,,,,,5   | 3610                               |
| v39,,,,,24   | 3659                               | v39,,,,,4   | 3609                               |
| v39,,,,,23   | 3659                               | v39,,,,,3   | 3610                               |
| v39,,,,,22   | 3658                               | v39,,,,,2   | 3610                               |
| v39,,,,,21   | 3658                               | v39,,,,,1   | 3598                               |
| v39,,,,,20   | 3653                               |             |                                    |

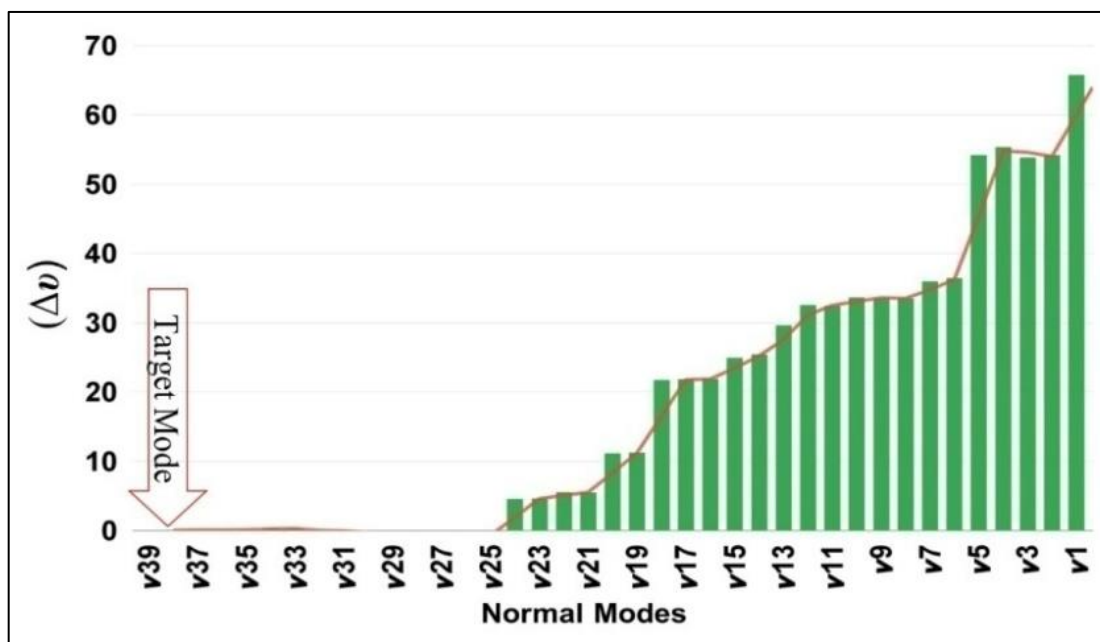

**Figure S5.** Effects of the addition of sequential normal modes (in descending order) on the O-H stretching ( $\nu_{39}$ ) of butanol. Y-axis represent the change in the wavenumber due to pure pair-wise coupling over diagonal values during sequential addition of normal modes.  $\Delta\nu = \nu_{\text{diagonal}} - \nu_{\text{VSCF-PT2}}$  (in  $\text{cm}^{-1}$ ) of O-H stretching.

Y-axis represents corrections due to pure pair-wise coupling effects on top of diagonal value ( $\Delta\nu$ ). X-axis represents the successive addition of normal modes with target mode O-H stretching ( $\nu_{39}$ ) for the construction of the anharmonic PES. For example,  $\nu_{38}$  and  $\nu_{37}$  represent PESs considering mode **39, 38** and mode **39, 38, 37**, respectively, and so on. It is found that for most of the cases strongly/moderately coupled modes the computed transitions undergo noticeable red shift while contributions of the weakly coupled modes are insignificant.

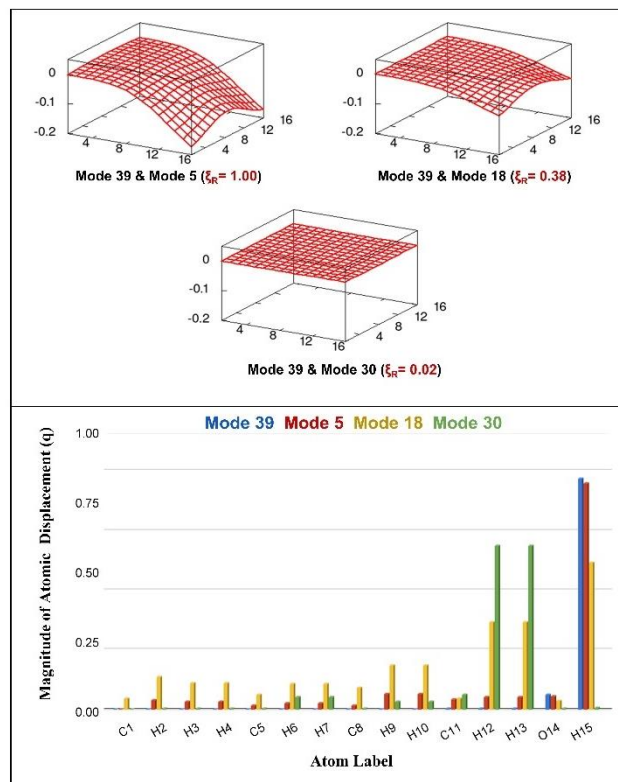

**Fig. S6.** Pair-wise coupling potentials ( $V_{ij}^{2coup}$ ) of 3 modes (upper panel) with different magnitude of couplings ( $\xi$ ) with O-H stretching (mode 39) for butanol molecule computed at B3LYP/6-311G(*d,p*) using  $16 \times 16$  grid (these 2D grids map the changes in potential energy as a function of displacement along 2 normal modes) along with their atomic displacement ( $q$ ) of same modes (lower panel).

**Table S3.** Comparisons of computed anharmonic frequencies (in  $\text{cm}^{-1}$ ) and intensities ( $\text{km mol}^{-1}$ ) of different VTA guided PESs considering various sets of normal modes by analysing relative normal mode displacement ( $q_R$ ) and relative coupling ( $\xi_R$ ) with diagonal and full PES for O-H stretching (mode **39**), O-H bending (mode **18**),  $\text{CH}_3$  stretching (Mode **37**) and  $\text{CH}_3$  bending (Mode **27**) of butanol. The bold number in PES type represents target mode. Here  $\omega_{\text{HO}}$  and  $I_{\text{HO}}$  represent corresponding harmonic frequencies (in  $\text{cm}^{-1}$ ) and intensities ( $\text{km mol}^{-1}$ ), respectively.

| <b>Mode 39: O-H stretching (<math>\omega_{\text{HO}} = 3835 \text{ cm}^{-1}</math>, <math>I_{\text{HO}} = 21.13</math>)</b> |            |                    |                  |                                                                               |                           |                    |                  |
|-----------------------------------------------------------------------------------------------------------------------------|------------|--------------------|------------------|-------------------------------------------------------------------------------|---------------------------|--------------------|------------------|
| PES type                                                                                                                    | $q_R$      | $\nu_{\text{O-H}}$ | $I_{\text{O-H}}$ | PES type                                                                      | $\xi_R$                   | $\nu_{\text{O-H}}$ | $I_{\text{O-H}}$ |
| Diagonal                                                                                                                    |            | 3664               | 14.1             | Diagonal                                                                      |                           | 3664               | 14.1             |
| <b>39</b> ,18,5                                                                                                             | $\geq 0.5$ | 3632               | 17.7             | <b>39</b> ,24,20,15,13<br>12,7                                                | $0.1 \leq \xi_R \leq 0.2$ | 3642               | 14.8             |
| <b>39</b> ,20,18,5                                                                                                          | $\geq 0.4$ | 3628               | 17.9             | <b>39</b> ,18,5,3,1                                                           | $\geq 0.2$                | 3613               | 18.1             |
| <b>39</b> ,24,20,18,15,5                                                                                                    | $\geq 0.3$ | 3622               | 18.1             | <b>39</b> ,24,20,18,15,13,12,7,5<br>,3,1                                      | $\geq 0.1$                | 3602               | 18.8             |
| <b>39</b> ,24,20,18,15,13,12,5,<br>3                                                                                        | $\geq 0.2$ | 3615               | 18.5             |                                                                               |                           |                    |                  |
| Full PES                                                                                                                    |            | 3598               | 18.9             | Full PES                                                                      |                           | 3598               | 18.9             |
| <b>Mode 18: O-H Bending (<math>\omega_{\text{HO}} = 1250 \text{ cm}^{-1}</math>, <math>I_{\text{HO}} = 44.36</math>)</b>    |            |                    |                  |                                                                               |                           |                    |                  |
| PES type                                                                                                                    | $q_R$      | $\nu_{\text{O-H}}$ | $I_{\text{O-H}}$ | PES type                                                                      | $\xi_R$                   | $\nu_{\text{O-H}}$ | $I_{\text{O-H}}$ |
| Diagonal                                                                                                                    |            | 1263               | 45.3             | Diagonal                                                                      |                           | 1263               | 45.3             |
| 39,24,20, <b>18</b> ,5                                                                                                      | $\geq 0.5$ | 1220               | 45.1             | 33,24,22,21, <b>18</b> ,6                                                     | $0.1 \leq \xi_R \leq 0.2$ | 1267               | 45.3             |
| 39,24,20, <b>18</b> ,15,12,5                                                                                                | $\geq 0.4$ | 1218               | 45.1             | 39,38,36,34,31,30,20, <b>18</b> ,<br>15,14,13,12,10,7,5,3,1                   | $\geq 0.2$                | 1200               | 45.0             |
| 39,24,20, <b>18</b> ,15,13,12,5,<br>3                                                                                       | $\geq 0.3$ | 1221               | 45.0             | 39,38,36,34,33,31,30,24,<br>22,21,20, <b>18</b> ,15,14,13,12,<br>10,7,6,5,3,1 | $\geq 0.1$                | 1204               | 45.0             |
| 39,24,22,20, <b>18</b> ,15,13,1,<br>2,7,5,3,1                                                                               | $\geq 0.2$ | 1224               | 45.0             |                                                                               |                           |                    |                  |
| Full PES                                                                                                                    |            | 1205               | 45.0             | Full PES                                                                      |                           | 1205               | 45.0             |
| <b>Mode 37: C-H stretching (<math>\omega_{\text{HO}} = 3079 \text{ cm}^{-1}</math>, <math>I_{\text{HO}} = 79.01</math>)</b> |            |                    |                  |                                                                               |                           |                    |                  |
| PES type                                                                                                                    | $q_R$      | $\nu_{\text{C-H}}$ | $I_{\text{C-H}}$ | PES type                                                                      | $\xi_R$                   | $\nu_{\text{C-H}}$ | $I_{\text{C-H}}$ |
| Diagonal                                                                                                                    |            | 3131               | 78.8             | Diagonal                                                                      |                           | 3131               | 78.8             |
| 38, <b>37</b> ,34,33,28,27,26,2<br>3,11,4                                                                                   | $\geq 0.5$ | 2910               | 76.8             | <b>37</b> ,36,35,28,27,26,25,11,<br>10,9,8                                    | $0.1 \leq \xi_R \leq 0.2$ | 3070               | 78.7             |
| 38, <b>37</b> ,34,33,28,27,26,2<br>5,23,15,11,9,4,1                                                                         | $\geq 0.4$ | 2891               | 76.7             | 38, <b>37</b> ,34,33,32,23,4,2,1                                              | $\geq 0.2$                | 2925               | 76.8             |
| 38, <b>37</b> ,36,34,33,28,27,2<br>6,25,23,17,15,12,11,10,<br>9,8,6,4,3,1                                                   | $\geq 0.3$ | 2875               | 76.6             | 38, <b>37</b> ,36,35,34,33,32,28,<br>27,26,25,23,11,10,9,8,4,<br>2,1          | $\geq 0.1$                | 2876               | 76.6             |
| 38, <b>37</b> ,36,35,34,33,28,2<br>7,26,25,23,21,17,16,15,<br>12,11,10,9,8,6,4,3,2,1                                        | $\geq 0.2$ | 2872               | 76.6             |                                                                               |                           |                    |                  |
| Full PES                                                                                                                    |            | 2862               | 76.6             | Full PES                                                                      |                           | 2862               | 76.6             |
| <b>Mode 27: C-H Bending (<math>\omega_{\text{HO}} = 1501 \text{ cm}^{-1}</math>, <math>I_{\text{HO}} = 7.6</math>)</b>      |            |                    |                  |                                                                               |                           |                    |                  |
| PES type                                                                                                                    | $q_R$      | $\nu_{\text{C-H}}$ | $I_{\text{C-H}}$ | PES type                                                                      | $\xi_R$                   | $\nu_{\text{C-H}}$ | $I_{\text{C-H}}$ |
| Diagonal                                                                                                                    |            | 1501               | 8.0              | Diagonal                                                                      |                           | 1501               | 8.0              |
| 38,33, <b>27</b> ,23,10,4                                                                                                   | $\geq 0.5$ | 1489               | 8.0              | 34,28, <b>27</b> ,26,4                                                        | $0.1 \leq \xi_R \leq 0.2$ | 1514               | 8.0              |
| 38,34,33, <b>27</b> ,23,15,10,4                                                                                             | $\geq 0.4$ | 1487               | 8.0              | 38, <b>37</b> , <b>27</b>                                                     | $\geq 0.2$                | 1465               | 8.0              |
| 38,34,33,28, <b>27</b> ,26,23,1<br>5,10,4,3,2                                                                               | $\geq 0.3$ | 1492               | 8.0              | 38,37,34,28,<br><b>27</b> ,26,4                                               | $\geq 0.1$                | 1482               | 8.0              |
| 38,34,33,28, <b>27</b> ,26,23,2<br>0,17,15,11,10,7,4,3,2                                                                    | $\geq 0.2$ | 1493               | 8.0              |                                                                               |                           |                    |                  |
| Full PES                                                                                                                    |            | 1480               | 8.0              | Full PES                                                                      |                           | 1480               | 8.0              |

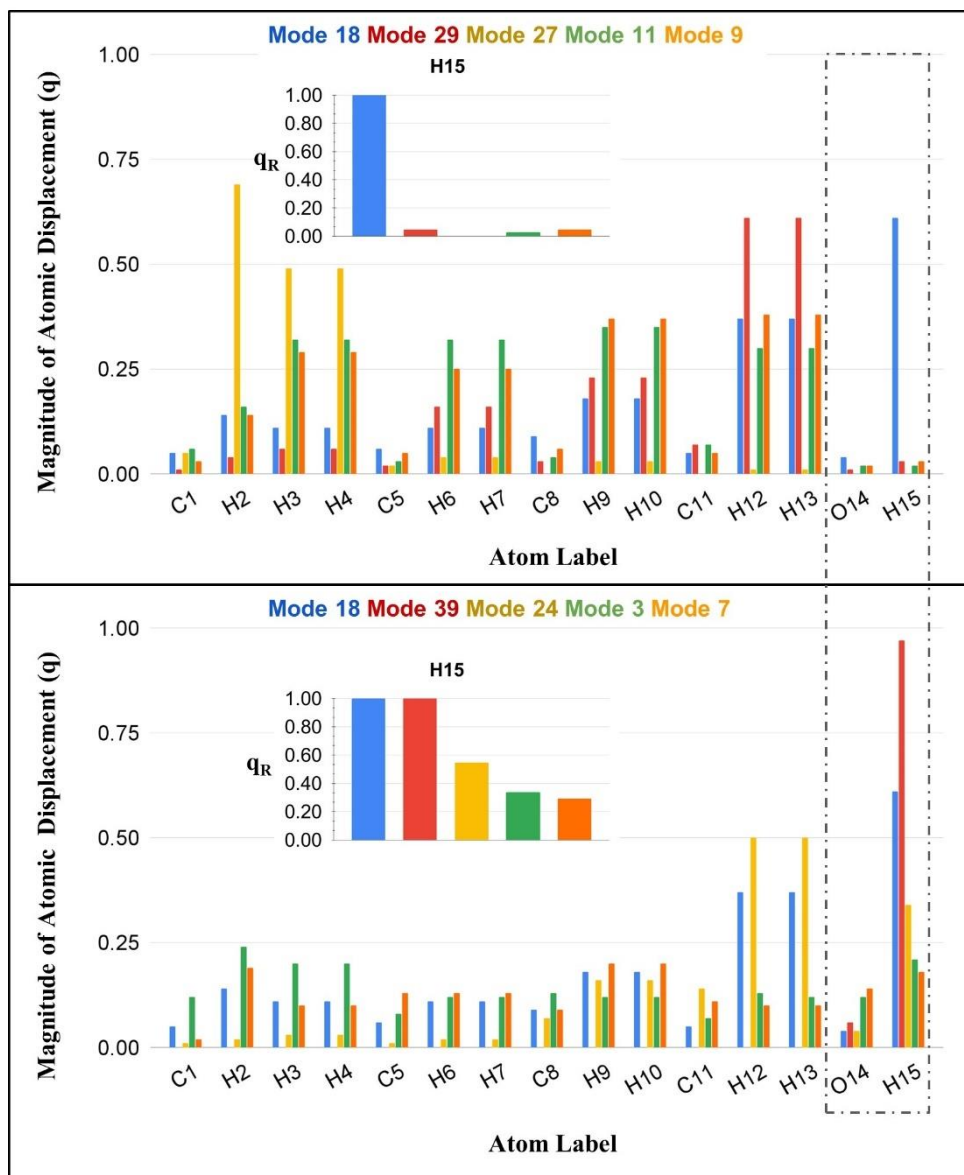

**Figure S7.** Normal mode analysis of O14-H15 bending (Mode **18**) of butanol. The upper and lower panels represent some weakly coupled and strongly coupled normal modes, respectively, with O-H bending. Displacements during different modes are given in different colors

**Table S4.** Individual coupling ( $\xi$ ) and relative coupling ( $\xi_R$ ) strength of O-H in plane bending ( $\xi_{18}$ ) with rest of the normal modes along with anharmonic corrections ( $\Delta\nu = \nu_{\text{diagonal}} - \nu_{\text{VSCF-PT2}}$  in  $\text{cm}^{-1}$ ) for butanol.

| Pair-wise coupling | $\xi$ | $\xi_R$ | $\Delta\nu$ | Pair-wise coupling | $\xi$ | $\xi_R$ | $\Delta\nu$ |
|--------------------|-------|---------|-------------|--------------------|-------|---------|-------------|
| $\xi(18,39)$       | 1188  | 0.85    | 25.06       | $\xi(18,20)$       | 324   | 0.23    | -3.73       |
| $\xi(18,38)$       | 373   | 0.27    | 1.37        | $\xi(18,19)$       | 49    | 0.03    | -1.63       |
| $\xi(18,37)$       | 97    | 0.07    | 1.45        | $\xi(18,17)$       | 52    | 0.04    | -1.01       |
| $\xi(18,36)$       | 414   | 0.30    | 3.23        | $\xi(18,16)$       | 108   | 0.08    | -0.64       |
| $\xi(18,35)$       | 114   | 0.08    | 1.41        | $\xi(18,15)$       | 349   | 0.25    | -2.28       |
| $\xi(18,34)$       | 561   | 0.40    | 1.57        | $\xi(18,14)$       | 299   | 0.21    | 0.26        |
| $\xi(18,33)$       | 209   | 0.15    | 1.89        | $\xi(18,13)$       | 571   | 0.41    | -4.24       |
| $\xi(18,32)$       | 87    | 0.06    | 0.24        | $\xi(18,12)$       | 657   | 0.47    | -1.63       |
| $\xi(18,31)$       | 1136  | 0.81    | 7.85        | $\xi(18,11)$       | 29    | 0.02    | -1.12       |
| $\xi(18,30)$       | 1395  | 1.00    | 4.33        | $\xi(18,10)$       | 319   | 0.23    | -0.88       |
| $\xi(18,29)$       | 27    | 0.02    | -0.2        | $\xi(18,9)$        | 73    | 0.05    | -1.6        |
| $\xi(18,28)$       | 69    | 0.05    | -0.14       | $\xi(18,8)$        | 60    | 0.04    | -0.72       |
| $\xi(18,27)$       | 60    | 0.04    | -0.13       | $\xi(18,7)$        | 485   | 0.35    | -3.48       |
| $\xi(18,26)$       | 31    | 0.02    | -0.2        | $\xi(18,6)$        | 240   | 0.17    | -0.15       |
| $\xi(18,25)$       | 91    | 0.07    | -0.05       | $\xi(18,5)$        | 526   | 0.38    | -16.8       |
| $\xi(18,24)$       | 242   | 0.17    | -4.25       | $\xi(18,4)$        | 59    | 0.04    | -1.39       |
| $\xi(18,23)$       | 101   | 0.07    | -0.54       | $\xi(18,3)$        | 554   | 0.40    | -3.8        |
| $\xi(18,22)$       | 228   | 0.16    | -1.07       | $\xi(18,2)$        | 112   | 0.08    | -0.31       |
| $\xi(18,21)$       | 139   | 0.10    | -0.48       | $\xi(18,1)$        | 1186  | 0.85    | -2.63       |

**Table S5.** Individual coupling ( $\xi$ ) and relative coupling ( $\xi_R$ ) strength of CH<sub>3</sub> stretching ( $\xi_{37}$ ) with rest of the normal modes along with anharmonic corrections ( $\Delta\nu = \nu_{\text{diagonal}} - \nu_{\text{VSCF-PT2}}$  in cm<sup>-1</sup>) for butanol.

| Pair-wise Coupling | $\xi$ | $\xi_R$ | $\Delta\nu$ | Pair-wise coupling | $\xi$ | $\xi_R$ | $\Delta\nu$ |
|--------------------|-------|---------|-------------|--------------------|-------|---------|-------------|
| $\xi(37,39)$       | 1     | 0.00    | 0.01        | $\xi(37,19)$       | 136   | 0.02    | 1.14        |
| $\xi(37,38)$       | 6377  | 0.77    | -5.93       | $\xi(37,18)$       | 97    | 0.01    | 1.53        |
| $\xi(37,36)$       | 1440  | 0.17    | -9.12       | $\xi(37,17)$       | 657   | 0.08    | 5.01        |
| $\xi(37,35)$       | 1254  | 0.15    | -8.87       | $\xi(37,16)$       | 423   | 0.05    | 3.16        |
| $\xi(37,34)$       | 8262  | 1.00    | 36.13       | $\xi(37,15)$       | 684   | 0.08    | 5.92        |
| $\xi(37,33)$       | 7648  | 0.93    | 46.23       | $\xi(37,14)$       | 34    | 0.00    | 0.25        |
| $\xi(39,32)$       | 1900  | 0.23    | 7.07        | $\xi(37,13)$       | 109   | 0.01    | 0.91        |
| $\xi(37,31)$       | 244   | 0.03    | -0.35       | $\xi(37,12)$       | 156   | 0.02    | 1.01        |
| $\xi(37,30)$       | 70    | 0.01    | -0.65       | $\xi(37,11)$       | 1259  | 0.15    | 10.24       |
| $\xi(37,29)$       | 21    | 0.00    | 0.65        | $\xi(37,10)$       | 982   | 0.12    | 8.35        |
| $\xi(37,28)$       | 1021  | 0.12    | 10.96       | $\xi(37,9)$        | 1185  | 0.14    | 9.7         |
| $\xi(37,27)$       | 1366  | 0.17    | 11.17       | $\xi(37,8)$        | 1113  | 0.13    | 9.51        |
| $\xi(37,26)$       | 1464  | 0.18    | 11.19       | $\xi(37,7)$        | 248   | 0.03    | 1.9         |
| $\xi(37,25)$       | 846   | 0.10    | 5.91        | $\xi(37,6)$        | 209   | 0.03    | 1.45        |
| $\xi(37,24)$       | 40    | 0.00    | 0.26        | $\xi(37,5)$        | 50    | 0.01    | 0.14        |
| $\xi(37,23)$       | 1949  | 0.24    | 20.11       | $\xi(37,4)$        | 4688  | 0.57    | 59.12       |
| $\xi(37,22)$       | 412   | 0.05    | 3.12        | $\xi(37,3)$        | 560   | 0.07    | 4.29        |
| $\xi(37,21)$       | 376   | 0.05    | 3.26        | $\xi(37,2)$        | 2594  | 0.31    | 25.14       |
| $\xi(37,20)$       | 79    | 0.01    | 2.33        | $\xi(37,1)$        | 2631  | 0.32    | 23.06       |



**Table S6.** Individual coupling ( $\xi$ ) and relative coupling ( $\xi_R$ ) strength of C-H bending ( $\xi_{27}$ ) with rest of the normal modes along with anharmonic corrections ( $\Delta\nu = \nu_{\text{diagonal}} - \nu_{\text{VSCF-PT2}}$  cm<sup>-1</sup>) for butanol.

| Pair-wise coupling | $\xi$ | $\xi_R$ | $\Delta\nu$ | Pair-wise coupling | $\xi$ | $\xi_R$ | $\Delta\nu$ |
|--------------------|-------|---------|-------------|--------------------|-------|---------|-------------|
| $\xi(27,39)$       | 2     | 0.00    | 0.02        | $\xi(27,19)$       | 9     | 0.00    | -0.06       |
| $\xi(27,38)$       | 3891  | 1.00    | 23.56       | $\xi(27,18)$       | 60    | 0.02    | -0.09       |
| $\xi(27,37)$       | 1366  | 0.35    | 10.83       | $\xi(27,17)$       | 19    | 0.00    | -0.5        |
| $\xi(27,36)$       | 131   | 0.03    | 1.28        | $\xi(27,16)$       | 14    | 0.00    | -0.29       |
| $\xi(27,35)$       | 78    | 0.02    | 0.69        | $\xi(27,15)$       | 41    | 0.01    | -0.83       |
| $\xi(27,34)$       | 685   | 0.18    | 2.76        | $\xi(27,14)$       | 22    | 0.01    | 0.16        |
| $\xi(27,33)$       | 198   | 0.05    | 8.38        | $\xi(27,13)$       | 3     | 0.00    | -0.05       |
| $\xi(27,32)$       | 46    | 0.01    | 0.66        | $\xi(27,12)$       | 28    | 0.01    | -0.06       |
| $\xi(27,31)$       | 1     | 0.00    | 0.01        | $\xi(27,11)$       | 51    | 0.01    | -1.06       |
| $\xi(27,30)$       | 3     | 0.00    | 0.04        | $\xi(27,10)$       | 65    | 0.02    | -1.57       |
| $\xi(27,29)$       | 68    | 0.02    | 0.06        | $\xi(27,9)$        | 60    | 0.02    | -0.92       |
| $\xi(27,28)$       | 448   | 0.12    | 0.43        | $\xi(27,8)$        | 18    | 0.00    | -0.37       |
| $\xi(27,26)$       | 520   | 0.13    | 0.54        | $\xi(27,7)$        | 40    | 0.01    | -0.44       |
| $\xi(27,25)$       | 334   | 0.09    | 0.12        | $\xi(27,6)$        | 67    | 0.02    | -0.34       |
| $\xi(27,24)$       | 8     | 0.00    | 0           | $\xi(27,5)$        | 10    | 0.00    | -0.05       |
| $\xi(27,23)$       | 105   | 0.03    | -0.08       | $\xi(27,4)$        | 388   | 0.10    | -17.64      |
| $\xi(27,22)$       | 90    | 0.02    | 0.12        | $\xi(27,3)$        | 55    | 0.01    | -0.83       |
| $\xi(27,21)$       | 4     | 0.00    | -0.07       | $\xi(27,2)$        | 326   | 0.08    | -6.11       |
| $\xi(27,20)$       | 50    | 0.01    | -0.04       | $\xi(27,1)$        | 101   | 0.03    | -0.4        |

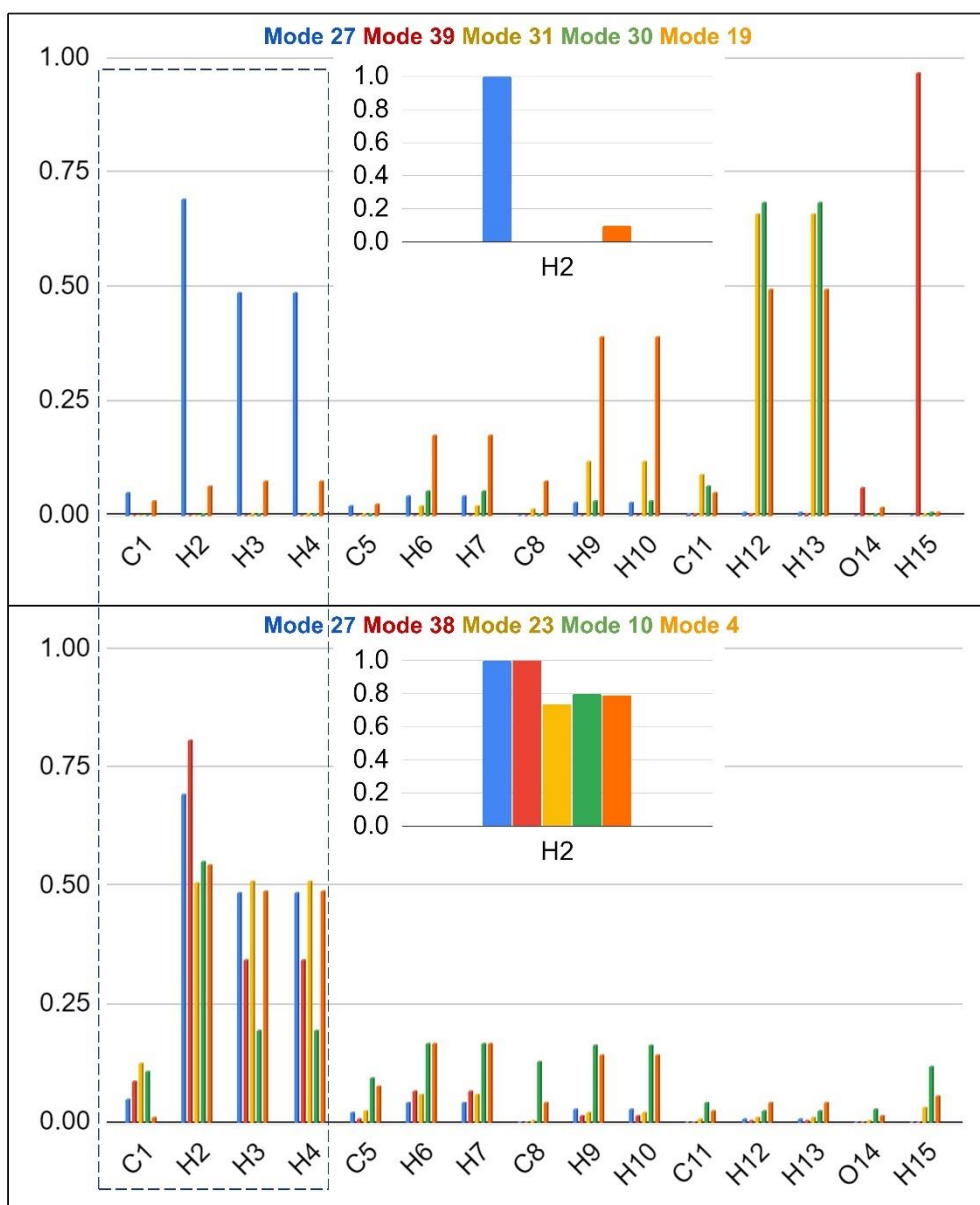

**Figure S8.** Normal mode analysis of C1-H2H3H4 bending (Mode 27) of butanol. The upper and lower panels represent some weakly coupled and strongly coupled normal modes, respectively, with C-H bending. Displacements during different modes are given in different colors.

**Table S7.** Comparative study of different relative coupling ( $\xi_R$ ) values for Mode **39** (O-H stretching), Mode **37** (CH<sub>3</sub> stretching), Mode **18** (O-H bending) and Mode **27** (CH<sub>3</sub> bending) of Butanol. Some selected normal modes of different relative coupling values are considered.

| O-H str. (Mode 39)                                          |       |         | O-H bend<br>[O-H in plane bend, CH <sub>2</sub> bend (H12-C11-H13)]<br>(Mode 18)                        |       |         | C-H str.<br>[CH <sub>2</sub> str. (H4-C1-H3)]<br>(Mode 37)       |       |         | C-H bend<br>C1-H2-H3-H4 bending<br>(Mode 27)                                       |       |         |
|-------------------------------------------------------------|-------|---------|---------------------------------------------------------------------------------------------------------|-------|---------|------------------------------------------------------------------|-------|---------|------------------------------------------------------------------------------------|-------|---------|
| Mode                                                        | $\xi$ | $\xi_R$ | Mode                                                                                                    | $\xi$ | $\xi_R$ | Mode                                                             | $\xi$ | $\xi_R$ | Mode                                                                               | $\xi$ | $\xi_R$ |
| <b>5</b>                                                    | 3092  | 1.00    | <b>30</b>                                                                                               | 1395  | 1.00    | <b>34</b>                                                        | 8262  | 1.00    | <b>38</b>                                                                          | 3891  | 1.00    |
| O-H out of plane bending                                    |       |         | CH <sub>2</sub> symmetric. Str. (H12-C11H13)                                                            |       |         | CH <sub>2</sub> symmetric. str (H9-C8-H10, CH <sub>3</sub> str.) |       |         | CH <sub>3</sub> anti-symmetric. Str.                                               |       |         |
| <b>18</b>                                                   | 1188  | 0.38    | <b>39</b>                                                                                               | 1188  | 0.85    | <b>33</b>                                                        | 7648  | 0.93    | <b>37</b>                                                                          | 1366  | 0.35    |
| O-H in plane bend, CH <sub>2</sub> bend (H12-C11-H13)       |       |         | O-H str.                                                                                                |       |         | CH <sub>2</sub> symmetric. str (H9-C8-H10, CH <sub>3</sub> str.) |       |         | CH <sub>3</sub> symmetric. Str. (H3-C1-H4)                                         |       |         |
| <b>13</b>                                                   | 572   | 0.19    | <b>31</b>                                                                                               | 1136  | 0.81    | <b>38</b>                                                        | 6377  | 0.77    | <b>34</b>                                                                          | 685   | 0.18    |
| O-H in plane bending, H10-C8-H9 bending                     |       |         | CH <sub>2</sub> anti-symmetric. str (H12-C11H13)                                                        |       |         | CH <sub>3</sub> anti-symmetric. str.                             |       |         | CH <sub>2</sub> symmetric. str (H9-C8-H10, C H3 str.)                              |       |         |
| <b>20</b>                                                   | 422   | 0.14    | <b>13</b>                                                                                               | 571   | 0.41    | <b>4</b>                                                         | 4688  | 0.57    | <b>26</b>                                                                          | 520   | 0.13    |
| O-H in plane bending, C5-H6-H7 bending, C8-H9-H10 bending   |       |         | O-H in plane bending, CH <sub>2</sub> bending (H9-C8-H10)                                               |       |         | CH <sub>3</sub> twisting                                         |       |         | CH <sub>2</sub> scissoring (H9-C8H10)                                              |       |         |
| <b>24</b>                                                   | 396   | 0.13    | <b>15</b>                                                                                               | 349   | 0.25    | <b>32</b>                                                        | 1900  | 0.23    | <b>28</b>                                                                          | 448   | 0.12    |
| O-H in plane bending, CH <sub>2</sub> bending (H12-C11-H13) |       |         | O-H in plane bending, CH <sub>3</sub> bending, CH <sub>2</sub> bending (H3-C1-H4, H6C5-H7, H12-C11-H13) |       |         | CH <sub>2</sub> symmetric. str. (H6-C5-H7)                       |       |         | CH <sub>3</sub> , CH <sub>2</sub> , CH <sub>2</sub> and CH <sub>2</sub> scissoring |       |         |
| <b>12</b>                                                   | 410   | 0.13    | <b>24</b>                                                                                               | 242   | 0.17    | <b>23</b>                                                        | 1949  | 0.24    | <b>4</b>                                                                           | 388   | 0.10    |
| C1-C5 str., C8-C11 str., O-H in bending                     |       |         | O-H in plane bending, H12C11-H13 bending                                                                |       |         | CH <sub>3</sub> bending                                          |       |         | CH <sub>3</sub> twisting                                                           |       |         |
| <b>15</b>                                                   | 342   | 0.11    | <b>32</b>                                                                                               | 87    | 0.06    | <b>26</b>                                                        | 1464  | 0.18    | <b>25</b>                                                                          | 334   | 0.09    |
| C5-C8 str., O-H in plane bending, CH <sub>3</sub> bending   |       |         | CH <sub>2</sub> symmetric. Str. (H6-C5-H7)                                                              |       |         | CH <sub>3</sub> and CH <sub>2</sub> scissoring (H9-C8H10)        |       |         | CH <sub>3</sub> , C1-H2-H3-H4, C5-H6-H7 and C8-H9-H10scissoring                    |       |         |
| <b>37</b>                                                   | 1     | 0.00    | <b>37</b>                                                                                               | 97    | 0.07    | <b>36</b>                                                        | 1440  | 0.17    | <b>2</b>                                                                           | 326   | 0.08    |
| CH <sub>2</sub> str. (H4-C1-H3)                             |       |         | CH <sub>3</sub> symmetric. Str. (H3-C1-H4)                                                              |       |         | CH <sub>2</sub> anti-symmetric. str (H9-C8-H10)                  |       |         | Chain Torsional mode                                                               |       |         |
| <b>36</b>                                                   | 1     | 0.00    | <b>11</b>                                                                                               | 29    | 0.02    | <b>30</b>                                                        | 70    | 0.01    | <b>33</b>                                                                          | 198   | 0.05    |
| CH <sub>2</sub> str. (H9-C8-H10)                            |       |         | CH <sub>3</sub> twisting, CH <sub>2</sub> twisting (H6-C5-H7, H9-C8-H10, H12-C11-H13)                   |       |         | CH <sub>2</sub> symmetric. str (H12-C11H13)                      |       |         | CH <sub>2</sub> symmetric. str (H9-C8-H10, CH <sub>3</sub> str.)                   |       |         |
| <b>35</b>                                                   | 10    | 0.00    | <b>27</b>                                                                                               | 60    | 0.04    | <b>13</b>                                                        | 109   | 0.01    | <b>23</b>                                                                          | 105   | 0.03    |
| CH <sub>2</sub> str. (H6-C5-H7)                             |       |         | CH <sub>3</sub> bending                                                                                 |       |         | O-H in plane bending, CH <sub>2</sub> bending (H9-C8-H10)        |       |         | CH <sub>3</sub> bending                                                            |       |         |

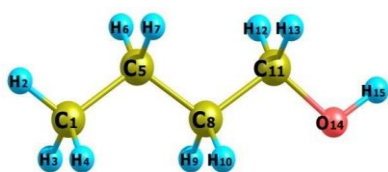

For example, the strongest coupling with O-H stretching is O-H out-of-plane bending (mode **5**,  $\xi_R = 1.0$ ) followed by chain torsion (mode **1**,  $\xi_R = 0.40$ ). Further, mode **18**, which is O-H in-plane + CH<sub>2</sub> (H12-C11-H13) bending of immediate neighbor posit strong coupling ( $\xi_R = 0.38$ ) while mode **20** which is O-H + next two -CH<sub>2</sub> (H9-C8-H10 + H6-C5-H7) bending posits weak coupling ( $\xi_R \approx 0.0$ ) due to spacing out from each other.

**Table S8.** Individual ( $\xi$ ); relative coupling ( $\xi_R$ ) strengths of anti-symmetric N-H stretching (mode **92**) with rest of the normal modes for NATA (three smallest torsional modes are excluded for numerical stability).

| <b>Modes</b> | $\xi$ | $\xi_R$ | <b>Modes</b> | $\xi$ | $\xi_R$ |
|--------------|-------|---------|--------------|-------|---------|
| <b>93</b>    | 27461 | 1.00    | <b>48</b>    | 3     | 0.00    |
|              | ---   | ---     | <b>47</b>    | 82    | 0.00    |
| <b>91</b>    | 6983  | 0.25    | <b>46</b>    | 3     | 0.00    |
| <b>90</b>    | 20542 | 0.75    | <b>45</b>    | 13    | 0.00    |
| <b>89</b>    | 28    | 0.00    | <b>44</b>    | 4     | 0.00    |
| <b>88</b>    | 5     | 0.00    | <b>43</b>    | 26    | 0.00    |
| <b>87</b>    | 11    | 0.00    | <b>42</b>    | 336   | 0.01    |
| <b>86</b>    | 4     | 0.00    | <b>41</b>    | 18    | 0.00    |
| <b>85</b>    | 2     | 0.00    | <b>40</b>    | 172   | 0.01    |
| <b>84</b>    | 27    | 0.00    | <b>39</b>    | 1927  | 0.07    |
| <b>83</b>    | 7     | 0.00    | <b>38</b>    | 257   | 0.01    |
| <b>82</b>    | 68    | 0.00    | <b>37</b>    | 299   | 0.01    |
| <b>81</b>    | 19    | 0.00    | <b>36</b>    | 1573  | 0.06    |
| <b>80</b>    | 3     | 0.00    | <b>35</b>    | 935   | 0.03    |
| <b>79</b>    | 75    | 0.00    | <b>34</b>    | 68    | 0.00    |
| <b>78</b>    | 120   | 0.00    | <b>33</b>    | 172   | 0.01    |
| <b>77</b>    | 170   | 0.01    | <b>32</b>    | 300   | 0.01    |
| <b>76</b>    | 39    | 0.00    | <b>31</b>    | 128   | 0.00    |
| <b>75</b>    | 2341  | 0.09    | <b>30</b>    | 149   | 0.01    |
| <b>74</b>    | 33    | 0.00    | <b>29</b>    | 307   | 0.01    |
| <b>73</b>    | 2     | 0.00    | <b>28</b>    | 120   | 0.00    |
| <b>72</b>    | 175   | 0.01    | <b>27</b>    | 280   | 0.01    |
| <b>71</b>    | 112   | 0.00    | <b>26</b>    | 2465  | 0.09    |
| <b>70</b>    | 9     | 0.00    | <b>25</b>    | 84    | 0.00    |
| <b>69</b>    | 7     | 0.00    | <b>24</b>    | 338   | 0.01    |
| <b>68</b>    | 6     | 0.00    | <b>23</b>    | 665   | 0.02    |
| <b>67</b>    | 0     | 0.00    | <b>22</b>    | 1231  | 0.04    |
| <b>66</b>    | 312   | 0.01    | <b>21</b>    | 454   | 0.02    |
| <b>65</b>    | 24    | 0.00    | <b>20</b>    | 219   | 0.01    |
| <b>64</b>    | 282   | 0.01    | <b>19</b>    | 118   | 0.00    |
| <b>63</b>    | 120   | 0.00    | <b>18</b>    | 141   | 0.01    |
| <b>62</b>    | 110   | 0.00    | <b>17</b>    | 137   | 0.00    |
| <b>61</b>    | 31    | 0.00    | <b>16</b>    | 53    | 0.00    |
| <b>60</b>    | 78    | 0.00    | <b>15</b>    | 84    | 0.00    |
| <b>59</b>    | 71    | 0.00    | <b>14</b>    | 143   | 0.01    |
| <b>58</b>    | 5     | 0.00    | <b>13</b>    | 71    | 0.00    |
| <b>57</b>    | 1686  | 0.06    | <b>12</b>    | 172   | 0.01    |
| <b>56</b>    | 23    | 0.00    | <b>11</b>    | 455   | 0.02    |
| <b>55</b>    | 140   | 0.01    | <b>10</b>    | 67    | 0.00    |
| <b>54</b>    | 93    | 0.00    | <b>9</b>     | 172   | 0.01    |
| <b>53</b>    | 9     | 0.00    | <b>8</b>     | 300   | 0.01    |
| <b>52</b>    | 2     | 0.00    | <b>7</b>     | 128   | 0.00    |
| <b>51</b>    | 9     | 0.00    | <b>6</b>     | 149   | 0.01    |
| <b>50</b>    | 27    | 0.00    | <b>5</b>     | 307   | 0.01    |
| <b>49</b>    | 34    | 0.00    | <b>4</b>     | 120   | 0.00    |

**Table S9.** Individual ( $\xi$ ) and relative ( $\xi_R$ ) coupling strength of symmetric N-H stretching ( $\xi_{90}$ ) with rest of the normal modes for NATA molecule.

| Mode | $\xi$ | $\xi_R$ | Mode | $\xi$ | $\xi_R$ | Mode | $\xi$ | $\xi_R$ |
|------|-------|---------|------|-------|---------|------|-------|---------|
| 93   | 1453  | 0.07    | 63   | 179   | 0.01    | 33   | 8203  | 0.40    |
| 92   | 20542 | 1.00    | 62   | 125   | 0.01    | 32   | 1101  | 0.05    |
| 91   | 608   | 0.03    | 61   | 64    | 0.00    | 31   | 1049  | 0.05    |
| 90   | --    | --      | 60   | 171   | 0.01    | 30   | 7296  | 0.36    |
| 89   | 23    | 0.00    | 59   | 22    | 0.00    | 29   | 5109  | 0.25    |
| 88   | 12    | 0.00    | 58   | 495   | 0.02    | 28   | 226   | 0.01    |
| 87   | 19    | 0.00    | 57   | 36    | 0.00    | 27   | 375   | 0.02    |
| 86   | 13    | 0.00    | 56   | 297   | 0.01    | 26   | 1331  | 0.06    |
| 85   | 11    | 0.00    | 55   | 29    | 0.00    | 25   | 218   | 0.01    |
| 84   | 140   | 0.01    | 54   | 83    | 0.00    | 24   | 911   | 0.04    |
| 83   | 43    | 0.00    | 53   | 42    | 0.00    | 23   | 1213  | 0.06    |
| 82   | 34    | 0.00    | 52   | 18    | 0.00    | 22   | 846   | 0.04    |
| 81   | 22    | 0.00    | 51   | 5995  | 0.29    | 21   | 1388  | 0.07    |
| 80   | 5     | 0.00    | 50   | 99    | 0.00    | 20   | 9334  | 0.45    |
| 79   | 357   | 0.02    | 49   | 21    | 0.00    | 19   | 130   | 0.01    |
| 78   | 391   | 0.02    | 48   | 76    | 0.00    | 18   | 70    | 0.00    |
| 77   | 829   | 0.04    | 47   | 13    | 0.00    | 17   | 406   | 0.02    |
| 76   | 29    | 0.00    | 46   | 9     | 0.00    | 16   | 4918  | 0.24    |
| 75   | 8103  | 0.39    | 45   | 102   | 0.00    | 15   | 769   | 0.04    |
| 74   | 14    | 0.00    | 44   | 93    | 0.00    | 14   | 223   | 0.01    |
| 73   | 52    | 0.00    | 43   | 60    | 0.00    | 13   | 301   | 0.01    |
| 72   | 578   | 0.03    | 42   | 11    | 0.00    | 12   | 736   | 0.04    |
| 71   | 3     | 0.00    | 41   | 409   | 0.02    | 11   | 11    | 0.00    |
| 70   | 120   | 0.01    | 40   | 11    | 0.00    | 10   | 643   | 0.03    |
| 69   | 57    | 0.00    | 39   | 30    | 0.00    | 9    | 352   | 0.02    |
| 68   | 46    | 0.00    | 38   | 4     | 0.00    | 8    | 225   | 0.01    |
| 67   | 7     | 0.00    | 37   | 91    | 0.00    | 7    | 418   | 0.02    |
| 66   | 42    | 0.00    | 36   | 1850  | 0.09    | 6    | 1264  | 0.06    |
| 65   | 86    | 0.00    | 35   | 124   | 0.01    | 5    | 479   | 0.02    |
| 64   | 240   | 0.01    | 34   | 915   | 0.04    | 4    | 522   | 0.03    |

**Table S10.** Individual ( $\xi$ ) and relative ( $\xi_R$ ) coupling strength of  $\phi$  NH stretching ( $\xi_{91}$ ) with rest of the normal modes for NATA molecule.

| Mode | $\xi$ | $\xi_R$     | Mode | $\xi$ | $\xi_R$ | Mode | $\xi$ | $\xi_R$ |
|------|-------|-------------|------|-------|---------|------|-------|---------|
| 93   | 2641  | 0.38        | 63   | 4     | 0.00    | 33   | 57    | 0.01    |
| 92   | 6983  | 1.00        | 62   | 56    | 0.01    | 32   | 38    | 0.01    |
| 91   | --    | --          | 61   | 17    | 0.00    | 31   | 29    | 0.00    |
| 90   | 608   | 0.09        | 60   | 178   | 0.03    | 30   | 48    | 0.01    |
| 89   | 48    | 0.01        | 59   | 7     | 0.00    | 29   | 43    | 0.01    |
| 88   | 78    | 0.01        | 58   | 460   | 0.07    | 28   | 1438  | 0.21    |
| 87   | 32    | 0.00        | 57   | 70    | 0.01    | 27   | 34    | 0.00    |
| 86   | 101   | 0.01        | 56   | 755   | 0.11    | 26   | 17    | 0.00    |
| 85   | 152   | 0.02        | 55   | 179   | 0.03    | 25   | 15    | 0.00    |
| 84   | 497   | 0.07        | 54   | 45    | 0.01    | 24   | 19    | 0.00    |
| 83   | 59    | 0.01        | 53   | 14    | 0.00    | 23   | 559   | 0.08    |
| 82   | 19    | 0.00        | 52   | 47    | 0.01    | 22   | 1703  | 0.24    |
| 81   | 58    | 0.01        | 51   | 62    | 0.01    | 21   | 873   | 0.13    |
| 80   | 184   | 0.03        | 50   | 62    | 0.01    | 20   | 202   | 0.03    |
| 79   | 229   | 0.03        | 49   | 7     | 0.00    | 19   | 21    | 0.00    |
| 78   | 1     | 0.00        | 48   | 45    | 0.01    | 18   | 44    | 0.01    |
| 77   | 100   | 0.01        | 47   | 4     | 0.00    | 17   | 82    | 0.01    |
| 76   | 38    | 0.01        | 46   | 22    | 0.00    | 16   | 45    | 0.01    |
| 75   | 46    | 0.01        | 45   | 51    | 0.01    | 15   | 45    | 0.01    |
| 74   | 26    | 0.00        | 44   | 133   | 0.02    | 14   | 140   | 0.02    |
| 73   | 13    | 0.00        | 43   | 158   | 0.02    | 13   | 24    | 0.00    |
| 72   | 700   | 0.10        | 42   | 21    | 0.00    | 12   | 45    | 0.01    |
| 71   | 2     | 0.00        | 41   | 8     | 0.00    | 11   | 19    | 0.00    |
| 70   | 166   | 0.02        | 40   | 63    | 0.01    | 10   | 50    | 0.01    |
| 69   | 103   | 0.01        | 39   | 15    | 0.00    | 9    | 12    | 0.00    |
| 68   | 9     | 0.00        | 38   | 27    | 0.00    | 8    | 65    | 0.01    |
| 67   | 42    | 0.01        | 37   | 31    | 0.00    | 7    | 91    | 0.01    |
| 66   | 53    | 0.01        | 36   | 43    | 0.01    | 6    | 396   | 0.06    |
| 65   | 50    | 0.01        | 35   | 20    | 0.00    | 5    | 242   | 0.03    |
| 64   | 140   | <b>0.02</b> | 34   | 113   | 0.02    | 4    | 31    | 0.00    |

**Table S11.** Individual ( $\xi$ ) and relative ( $\xi_R$ ) coupling strength of Indole N-H stretching ( $\xi_{93}$ ) with rest of the normal modes for NATA molecule.

| Mode | $\xi$ | $\xi_R$ | Mode | $\xi$ | $\xi_R$ | Mode | $\xi$ | $\xi_R$ |
|------|-------|---------|------|-------|---------|------|-------|---------|
| 93   | --    | --      | 63   | 142   | 0.01    | 33   | 44    | 0.00    |
| 92   | 27461 | 1.00    | 62   | 153   | 0.01    | 32   | 18    | 0.00    |
| 91   | 2641  | 0.10    | 61   | 116   | 0.00    | 31   | 17    | 0.00    |
| 90   | 1497  | 0.05    | 60   | 88    | 0.00    | 30   | 73    | 0.00    |
| 89   | 3161  | 0.12    | 59   | 202   | 0.01    | 29   | 56    | 0.00    |
| 88   | 24    | 0.00    | 58   | 79    | 0.00    | 28   | 7     | 0.00    |
| 87   | 44    | 0.00    | 57   | 350   | 0.01    | 27   | 176   | 0.01    |
| 86   | 124   | 0.00    | 56   | 8     | 0.00    | 26   | 389   | 0.01    |
| 85   | 5     | 0.00    | 55   | 103   | 0.00    | 25   | 111   | 0.00    |
| 84   | 2     | 0.00    | 54   | 237   | 0.01    | 24   | 19    | 0.00    |
| 83   | 1     | 0.00    | 53   | 26    | 0.00    | 23   | 55    | 0.00    |
| 82   | 81    | 0.00    | 52   | 18    | 0.00    | 22   | 83    | 0.00    |
| 81   | 10    | 0.00    | 51   | 150   | 0.01    | 21   | 88    | 0.00    |
| 80   | 4     | 0.00    | 50   | 45    | 0.00    | 20   | 546   | 0.02    |
| 79   | 2     | 0.00    | 49   | 258   | 0.01    | 19   | 219   | 0.01    |
| 78   | 27    | 0.00    | 48   | 368   | 0.01    | 18   | 1140  | 0.04    |
| 77   | 7     | 0.00    | 47   | 2     | 0.00    | 17   | 2044  | 0.07    |
| 76   | 183   | 0.01    | 46   | 4     | 0.00    | 16   | 1296  | 0.05    |
| 75   | 57    | 0.00    | 45   | 35    | 0.00    | 15   | 808   | 0.03    |
| 74   | 94    | 0.00    | 44   | 61    | 0.00    | 14   | 148   | 0.01    |
| 73   | 106   | 0.00    | 43   | 17    | 0.00    | 13   | 187   | 0.01    |
| 72   | 21    | 0.00    | 42   | 18    | 0.00    | 12   | 37    | 0.00    |
| 71   | 321   | 0.01    | 41   | 37    | 0.00    | 11   | 386   | 0.01    |
| 70   | 4     | 0.00    | 40   | 16    | 0.00    | 10   | 22    | 0.00    |
| 69   | 60    | 0.00    | 39   | 63    | 0.00    | 9    | 23    | 0.00    |
| 68   | 24    | 0.00    | 38   | 41    | 0.00    | 8    | 106   | 0.00    |
| 67   | 3     | 0.00    | 37   | 29    | 0.00    | 7    | 16    | 0.00    |
| 66   | 555   | 0.02    | 36   | 50    | 0.00    | 6    | 19    | 0.00    |
| 65   | 6     | 0.00    | 35   | 52    | 0.00    | 5    | 207   | 0.01    |
| 64   | 109   | 0.00    | 34   | 44    | 0.00    | 4    | 8     | 0.00    |

**Table S12.** Individual ( $\xi$ ) and relative ( $\xi_R$ ) coupling strength of C=O stretching ( $\xi_{78}$ ) with rest of the normal modes for NATA molecule.

| Mode | $\xi$ | $\xi_R$ | Mode | $\xi$ | $\xi_R$ | Mode | $\xi$ | $\xi_R$ |
|------|-------|---------|------|-------|---------|------|-------|---------|
| 93   | 27    | 0.01    | 63   | 1013  | 0.46    | 33   | 461   | 0.21    |
| 92   | 120   | 0.05    | 62   | 417   | 0.19    | 32   | 150   | 0.07    |
| 91   | 1     | 0.00    | 61   | 11    | 0.00    | 31   | 409   | 0.19    |
| 90   | 391   | 0.18    | 60   | 410   | 0.19    | 30   | 288   | 0.13    |
| 89   | 24    | 0.01    | 59   | 177   | 0.08    | 29   | 193   | 0.09    |
| 88   | 4     | 0.00    | 58   | 422   | 0.19    | 28   | 31    | 0.01    |
| 87   | 9     | 0.00    | 57   | 191   | 0.09    | 27   | 135   | 0.06    |
| 86   | 6     | 0.00    | 56   | 438   | 0.20    | 26   | 152   | 0.07    |
| 85   | 8     | 0.00    | 55   | 173   | 0.08    | 25   | 49    | 0.02    |
| 84   | 13    | 0.01    | 54   | 487   | 0.22    | 24   | 87    | 0.04    |
| 83   | 3     | 0.00    | 53   | 144   | 0.07    | 23   | 450   | 0.20    |
| 82   | 34    | 0.02    | 52   | 100   | 0.05    | 22   | 59    | 0.03    |
| 81   | 17    | 0.01    | 51   | 2200  | 1.00    | 21   | 215   | 0.10    |
| 80   | 7     | 0.00    | 50   | 10    | 0.00    | 20   | 762   | 0.35    |
| 79   | 145   | 0.07    | 49   | 104   | 0.05    | 19   | 48    | 0.02    |
| 78   | --    | --      | 48   | 172   | 0.08    | 18   | 16    | 0.01    |
| 77   | 220   | 0.10    | 47   | 67    | 0.03    | 17   | 30    | 0.01    |
| 76   | 38    | 0.02    | 46   | 37    | 0.02    | 16   | 504   | 0.23    |
| 75   | 1158  | 0.53    | 45   | 141   | 0.06    | 15   | 74    | 0.03    |
| 74   | 14    | 0.01    | 44   | 264   | 0.12    | 14   | 185   | 0.08    |
| 73   | 118   | 0.05    | 43   | 361   | 0.16    | 13   | 63    | 0.03    |
| 72   | 352   | 0.16    | 42   | 8     | 0.00    | 12   | 187   | 0.08    |
| 71   | 4     | 0.00    | 41   | 194   | 0.09    | 11   | 113   | 0.05    |
| 70   | 12    | 0.01    | 40   | 12    | 0.01    | 10   | 99    | 0.04    |
| 69   | 84    | 0.04    | 39   | 65    | 0.03    | 9    | 130   | 0.06    |
| 68   | 233   | 0.11    | 38   | 4     | 0.00    | 8    | 103   | 0.05    |
| 67   | 24    | 0.01    | 37   | 108   | 0.05    | 7    | 30    | 0.01    |
| 66   | 14    | 0.01    | 36   | 471   | 0.21    | 6    | 75    | 0.03    |
| 65   | 11    | 0.01    | 35   | 69    | 0.03    | 5    | 1282  | 0.58    |
| 64   | 781   | 0.35    | 34   | 28    | 0.01    | 4    | 32    | 0.01    |



**Table S13.** Individual ( $\xi$ ) and relative ( $\xi_R$ ) coupling strength of NH<sub>2</sub> bending ( $\xi_{51}$ ) with rest of the normal modes for NATA molecule.

| Mode | $\xi$ | $\xi_R$ | Mode | $\xi$ | $\xi_R$ | Mode | $\xi$ | $\xi_R$ |
|------|-------|---------|------|-------|---------|------|-------|---------|
| 93   | 150   | 0.03    | 63   | 221   | 0.04    | 33   | 491   | 0.08    |
| 92   | 1686  | 0.28    | 62   | 415   | 0.07    | 32   | 126   | 0.02    |
| 91   | 62    | 0.01    | 61   | 8     | 0.00    | 31   | 174   | 0.03    |
| 90   | 5995  | 1.00    | 60   | 561   | 0.09    | 30   | 331   | 0.06    |
| 89   | 34    | 0.01    | 59   | 88    | 0.01    | 29   | 91    | 0.02    |
| 88   | 11    | 0.00    | 58   | 2421  | 0.40    | 28   | 16    | 0.00    |
| 87   | 8     | 0.00    | 57   | 23    | 0.00    | 27   | 178   | 0.03    |
| 86   | 12    | 0.00    | 56   | 141   | 0.02    | 26   | 142   | 0.02    |
| 85   | 10    | 0.00    | 55   | 52    | 0.01    | 25   | 25    | 0.00    |
| 84   | 19    | 0.00    | 54   | 106   | 0.02    | 24   | 156   | 0.03    |
| 83   | 9     | 0.00    | 53   | 54    | 0.01    | 23   | 183   | 0.03    |
| 82   | 34    | 0.01    | 52   | 70    | 0.01    | 22   | 185   | 0.03    |
| 81   | 203   | 0.03    | 51   | --    | --      | 21   | 487   | 0.08    |
| 80   | 2     | 0.00    | 50   | 61    | 0.01    | 20   | 612   | 0.10    |
| 79   | 330   | 0.06    | 49   | 126   | 0.02    | 19   | 54    | 0.01    |
| 78   | 2200  | 0.37    | 48   | 99    | 0.02    | 18   | 28    | 0.00    |
| 77   | 71    | 0.01    | 47   | 39    | 0.01    | 17   | 142   | 0.02    |
| 76   | 32    | 0.01    | 46   | 28    | 0.00    | 16   | 327   | 0.05    |
| 75   | 744   | 0.12    | 45   | 125   | 0.02    | 15   | 378   | 0.06    |
| 74   | 56    | 0.01    | 44   | 33    | 0.01    | 14   | 50    | 0.01    |
| 73   | 132   | 0.02    | 43   | 33    | 0.01    | 13   | 175   | 0.03    |
| 72   | 70    | 0.01    | 42   | 4     | 0.00    | 12   | 299   | 0.05    |
| 71   | 2     | 0.00    | 41   | 140   | 0.02    | 11   | 8     | 0.00    |
| 70   | 24    | 0.00    | 40   | 4     | 0.00    | 10   | 58    | 0.01    |
| 69   | 25    | 0.00    | 39   | 20    | 0.00    | 9    | 227   | 0.04    |
| 68   | 23    | 0.00    | 38   | 11    | 0.00    | 8    | 27    | 0.00    |
| 67   | 3     | 0.00    | 37   | 36    | 0.01    | 7    | 75    | 0.01    |
| 66   | 36    | 0.01    | 36   | 96    | 0.02    | 6    | 86    | 0.01    |
| 65   | 39    | 0.01    | 35   | 12    | 0.00    | 5    | 1286  | 0.21    |
| 64   | 2129  | 0.36    | 34   | 34    | 0.01    | 4    | 22    | 0.00    |

**Table S14.** Comparative study of  $\xi_{\max}$  for selected N-H stretching, N-H bending and C=O stretching for NATA molecule.

| <b>Target Mode (<math>\omega</math>)</b> | <b>Mode with maximum coupling</b> | <b><math>\xi_{\max}</math></b> |
|------------------------------------------|-----------------------------------|--------------------------------|
| <b>93</b> (3684)                         | 92                                | 27461                          |
| <b>92</b> (3683)                         | 93                                | 27461                          |
| <b>91</b> (3599)                         | 92                                | 6983                           |
| <b>90</b> (3473)                         | 92                                | 20542                          |
| <b>51</b> (1135)                         | 90                                | 5995                           |
| <b>78</b> (1755)                         | 51                                | 2200                           |
| <b>77</b> (1714)                         | 58                                | 2677                           |

**Table S15.** Comparisons of computed anharmonic frequencies (in  $\text{cm}^{-1}$ ) and intensities ( $\text{km mol}^{-1}$ ) of different VTA guided PESs considering various sets of normal modes by analysing relative atomic displacement ( $q_R$ ) and relative coupling ( $\xi_R$ ) with diagonal and full PES for Symmetric-NH stretching (Mode **90**),  $\phi$  N-H (Mode **91**), Anti-symmetric-  $\text{NH}_2$  (Mode **92**), Indole N-H stretching (Mode **93**), C=O stretching (Mode **78**),  $\text{NH}_2$  bending (Mode **51**), and C=O stretching (Mode **77**) for NATA molecule. The bold number in PES type represent target mode. Here  $\omega_{\text{HO}}$  and  $I_{\text{HO}}$  represents corresponding harmonic frequencies (in  $\text{cm}^{-1}$ ) and intensities ( $\text{km mol}^{-1}$ ), respectively.

| <b>Mode 90: Symmetric NH stretching (<math>\omega_{\text{HO}} = 3473 \text{ cm}^{-1}</math>, <math>I_{\text{HO}} = 144.5</math>)</b>                           |            |                    |                  |                                                                                                         |             |                    |                  |
|----------------------------------------------------------------------------------------------------------------------------------------------------------------|------------|--------------------|------------------|---------------------------------------------------------------------------------------------------------|-------------|--------------------|------------------|
| PES type                                                                                                                                                       | $q_R$      | $\nu_{\text{N-H}}$ | $I_{\text{N-H}}$ | PES type                                                                                                | $\xi_R$     | $\nu_{\text{N-H}}$ | $I_{\text{N-H}}$ |
| Diagonal                                                                                                                                                       |            | 3359               | 156.4            | Diagonal                                                                                                |             | 3359               | 156.4            |
| <b>90</b> ,75,51,33,30                                                                                                                                         | $\geq 0.5$ | 3338               | 151.2            | 92, <b>90</b> ,75,51,33,30,<br>29,20,16                                                                 | $\geq 0.2$  | 3235               | 150.3            |
| <b>90</b> ,75,51,33,30                                                                                                                                         | $\geq 0.4$ | 3338               | 151.2            | 92, <b>90</b> ,75,51,36,33,<br>30,29,20,16                                                              | $\geq 0.1$  | 3235               | 150.1            |
| 92, <b>90</b> ,75,51,33,30,29,20                                                                                                                               | $\geq 0.3$ | 3257               | 151.6            | 93,92, <b>90</b> ,75,51,36,<br>33,32,31,30,29,2<br>6,23,21,20,16,6                                      | $\geq 0.05$ | 3220               | 152.5            |
| 92, <b>90</b> ,75,51,36,33,30,29,21,20,16,15                                                                                                                   | $\geq 0.2$ | 3234               | 149.6            | 93,92,91, <b>90</b> ,77,75,<br>72,51,36,34,33,3<br>2,31,30,29,26,24,<br>23,22,21,20,16,15<br>,12,10,6,4 | $\geq 0.03$ | 3217               | 150.8            |
| Full PES                                                                                                                                                       |            | 3255               | 147.8            | Full PES                                                                                                |             | 3255               | 147.8            |
| <b>Mode 91: <math>\phi</math> N-H stretching (<math>\omega_{\text{HO}} = 3599 \text{ cm}^{-1}</math>, <math>I_{\text{HO}} = 159.3</math>)</b>                  |            |                    |                  |                                                                                                         |             |                    |                  |
| PES type                                                                                                                                                       | $q_R$      | $\nu_{\text{N-H}}$ | $I_{\text{N-H}}$ | PES type                                                                                                | $\xi_R$     | $\nu_{\text{N-H}}$ | $I_{\text{N-H}}$ |
| Diagonal                                                                                                                                                       |            | 3446               | 166.2            | Diagonal                                                                                                |             | 3446               | 166.2            |
| <b>91</b> ,72,28,22                                                                                                                                            | $\geq 0.5$ | 3414               | 162.7            | 93,92, <b>91</b> ,28,22                                                                                 | $\geq 0.2$  | 3418               | 163.4            |
| <b>91</b> ,72,58,56,28,22                                                                                                                                      | $\geq 0.4$ | 3402               | 162.2            | 93,92, <b>91</b> ,72,56,28,<br>22,21                                                                    | $\geq 0.1$  | 3402               | 161.8            |
| <b>91</b> ,72,58,56,28,22,21                                                                                                                                   | $\geq 0.3$ | 3396               | 161.7            | 93,92, <b>91</b> ,90,84,72,<br>58,56,28,23,22,2<br>1,6                                                  | $\geq 0.05$ | 3397               | 161.2            |
| <b>91</b> ,72,70,60,58,56,28,23,22,21,20                                                                                                                       | $\geq 0.2$ | 3387               | 161.2            | 93,92, <b>91</b> ,90,84,80,<br>79,72,60,58,56,5<br>5,28,23,22,21,20,<br>6,5                             | $\geq 0.03$ | 3387               | 160.8            |
| Full PES                                                                                                                                                       |            | 3394               | 160.8            | Full PES                                                                                                |             | 3394               | 160.8            |
| <b>Mode 92: Anti-symmetric <math>\text{NH}_2</math> stretching (<math>\omega_{\text{HO}} = 3683 \text{ cm}^{-1}</math>, <math>I_{\text{HO}} = 67.6</math>)</b> |            |                    |                  |                                                                                                         |             |                    |                  |
| PES type                                                                                                                                                       | $q_R$      | $\nu_{\text{N-H}}$ | $I_{\text{N-H}}$ | PES type                                                                                                | $\xi_R$     | $\nu_{\text{N-H}}$ | $I_{\text{N-H}}$ |
| Diagonal                                                                                                                                                       |            | 3651               | 62.8             | Diagonal                                                                                                |             | 3651               | 62.8             |
| <b>92</b> ,75,20,16                                                                                                                                            | $\geq 0.5$ | 3517               | 64.7             | 93, <b>92</b> ,91,90                                                                                    | $\geq 0.2$  | 3532               | 62.9             |
| <b>92</b> ,90,75,51,33,20,16                                                                                                                                   | $\geq 0.4$ | 3472               | 64.8             | 93, <b>92</b> ,91,90,75,20                                                                              | $\geq 0.1$  | 3493               | 64.1             |
| <b>92</b> ,90,75,58,51,33,30,20,16                                                                                                                             | $\geq 0.3$ | 3463               | 64.7             | 93, <b>92</b> ,91,90,75,51,<br>33,30,20                                                                 | $\geq 0.05$ | 3465               | 64.1             |
| <b>92</b> ,90,75,64,60,58,51,33,31,30,29,21,20,16,12                                                                                                           | $\geq 0.2$ | 3453               | 64.8             | 93, <b>92</b> ,91,90,75,51,<br>33,30,29,20,16                                                           | $\geq 0.03$ | 3449               | 64.9             |
| Full PES                                                                                                                                                       |            | 3455               | 64.6             | Full PES                                                                                                |             | 3455               | 64.6             |
| <b>Mode 93: Indole N-H stretching (<math>\omega_{\text{HO}} = 3684 \text{ cm}^{-1}</math>, <math>I_{\text{HO}} = 93.8</math>)</b>                              |            |                    |                  |                                                                                                         |             |                    |                  |
| PES type                                                                                                                                                       | $q_R$      | $\nu_{\text{N-H}}$ | $I_{\text{N-H}}$ | PES type                                                                                                | $\xi_R$     | $\nu_{\text{N-H}}$ | $I_{\text{N-H}}$ |
| Diagonal                                                                                                                                                       |            | 3556               | 84.7             | Diagonal                                                                                                |             | 3556               | 84.7             |
| <b>93</b> ,17                                                                                                                                                  | $\geq 0.5$ | 3526               | 87.2             | <b>93</b> ,92                                                                                           | $\geq 0.2$  | 3543               | 84.1             |
| <b>93</b> ,66,17                                                                                                                                               | $\geq 0.4$ | 3521               | 87.6             | <b>93</b> ,92,91,89                                                                                     | $\geq 0.1$  | 3544               | 84.1             |
| <b>93</b> ,66,57,49,48,26,18,17                                                                                                                                | $\geq 0.3$ | 3494               | 88.5             | <b>93</b> ,92,91,90,89,17,<br>16                                                                        | $\geq 0.05$ | 3509               | 87.0             |
| <b>93</b> ,71,66,62,57,55,54,49,48,26,19,18,17,16                                                                                                              | $\geq 0.2$ | 3485               | 89.2             | <b>93</b> ,92,91,90,89,18,<br>17,16,15                                                                  | $\geq 0.03$ | 3491               | 87.7             |

|                                                                                                                      |           |                               |                             |                                                                           |                           |                               |                             |
|----------------------------------------------------------------------------------------------------------------------|-----------|-------------------------------|-----------------------------|---------------------------------------------------------------------------|---------------------------|-------------------------------|-----------------------------|
| 93, 92, 76, 74, 71, 66, 62, 59, 57, 55, 54, 53, 49, 48, 44, 39, 27, 26, 25, 19, 18, 17, 16, 15, 11                   | ≥ 0.1     | 3441                          | 89.3                        |                                                                           |                           |                               |                             |
| Full PES                                                                                                             |           | 3452                          | 89.2                        | Full PES                                                                  |                           | 3452                          | 89.2                        |
| <b>Mode 78: C=O stretching (<math>\omega_{HO} = 1755 \text{ cm}^{-1}</math>, <math>I_{HO} = 400.5</math>)</b>        |           |                               |                             |                                                                           |                           |                               |                             |
| <b>PES type</b>                                                                                                      | <b>qr</b> | <b><math>\nu_{C=O}</math></b> | <b><math>I_{C=O}</math></b> | <b>PES type</b>                                                           | <b><math>\xi_R</math></b> | <b><math>\nu_{C=O}</math></b> | <b><math>I_{C=O}</math></b> |
| Diagonal                                                                                                             |           | 1750                          | 396.0                       | Diagonal                                                                  |                           | 1750                          | 396.0                       |
| 78,51,23,21,15,14,13,9,6,5                                                                                           | ≥ 0.5     | 1737                          | 395.8                       | 78,75,64,63,56,54,51,36,33,23,20,16,5                                     | ≥ 0.2                     | 1738                          | 396.2                       |
| 78,51,33,27,23,21,15,14,13,9,6,5                                                                                     | ≥ 0.4     | 1735                          | 395.9                       | 90,78,77,75,72,68,64,63,62,60,58,56,54,51,44,43,36,33,31,30,23,21,20,16,5 | ≥ 0.1                     | 1731                          | 396.6                       |
| 78,51,36,33,31,30,27,23,21,15,14,13,12,10,9,8,7,6,5,4                                                                | ≥ 0.3     | 1732                          | 396.0                       |                                                                           |                           |                               |                             |
| 78,75,51,36,33,31,30,29,27,26,24,23,22,21,20,16,15,14,13,12,10,9,8,7,6,5,4                                           | ≥ 0.2     | 1733                          | 396.3                       |                                                                           |                           |                               |                             |
| Full PES                                                                                                             |           | 1723                          | 396.8                       | Full PES                                                                  |                           | 1723                          | 396.8                       |
| <b>Mode 51: NH<sub>2</sub> bending (<math>\omega_{HO} = 1135 \text{ cm}^{-1}</math>, <math>I_{HO} = 0.85</math>)</b> |           |                               |                             |                                                                           |                           |                               |                             |
| <b>PES type</b>                                                                                                      | <b>qr</b> | <b><math>\nu_{N-H}</math></b> | <b><math>I_{N-H}</math></b> | <b>PES type</b>                                                           | <b><math>\xi_R</math></b> | <b><math>\nu_{N-H}</math></b> | <b><math>I_{N-H}</math></b> |
| Diagonal                                                                                                             |           | 1147                          | 0.8                         | Diagonal                                                                  |                           | 1147                          | 0.8                         |
| 92,90,75,51,33,30,29,20                                                                                              | ≥ 0.5     | 1118                          | 0.8                         | 92,90,78,64,58,51,5                                                       | ≥ 0.2                     | 1115                          | 0.8                         |
| 92,90,75,51,33,30,29,20                                                                                              | ≥ 0.4     | 1118                          | 0.8                         | 92,90,78,75,64,58,51,20,5                                                 | ≥ 0.1                     | 1119                          | 0.8                         |
| 92,90,75,51,36,33,32,30,29,21,20,16,15,12                                                                            | ≥ 0.3     | 1116                          | 0.8                         |                                                                           |                           |                               |                             |
| 92,90,77,75,51,36,34,33,32,31,30,29,26,23,21,20,16,15,12                                                             | ≥ 0.2     | 1116                          | 0.8                         |                                                                           |                           |                               |                             |
| Full PES                                                                                                             |           | 1116                          | 0.8                         | Full PES                                                                  |                           | 1116                          | 0.8                         |
| <b>C=O stretching (Mode 77; <math>\omega=1714 \text{ cm}^{-1}</math>, <math>I_{HO} = 235.6</math>)</b>               |           |                               |                             |                                                                           |                           |                               |                             |
| <b>PES type</b>                                                                                                      | <b>qr</b> | <b><math>\nu_{C=O}</math></b> | <b><math>I_{C=O}</math></b> | <b>PES type</b>                                                           | <b><math>\xi_R</math></b> | <b><math>\nu_{C=O}</math></b> | <b><math>I_{C=O}</math></b> |
| Diagonal                                                                                                             |           | 1709                          | 231.8                       | Diagonal                                                                  |                           | 1709                          | 231.8                       |
| 77,43,28,23,16,13,10,7,6,5                                                                                           | ≥ 0.5     | 1699                          | 232.3                       | 90,77,75,72,70,58,56,45,44,43,20                                          | ≥ 0.2                     | 1697                          | 232.0                       |
| 77,45,43,28,27,26,23,20,16,13,10,7,6,5                                                                               | ≥ 0.4     | 1699                          | 232.5                       | 90,77,75,72,70,65,61,60,58,56,54,50,45,44,43,29,23,22,20,16               | ≥ 0.1                     | 1696                          | 232.5                       |
| 77,56,45,43,28,27,26,24,23,22,20,16,15,13,12,10,9,7,6,5,4                                                            | ≥ 0.3     | 1700                          | 232.7                       |                                                                           |                           |                               |                             |
| 77,75,58,56,45,44,43,37,36,31,29,28,27,26,24,23,22,21,20,16,15,14,13,12,10,9,8,7,6,5,4                               | ≥ 0.2     | 1697                          | 232.9                       |                                                                           |                           |                               |                             |
| Full PES                                                                                                             |           | 1681                          | 233.1                       | Full PES                                                                  |                           | 1681                          | 233.1                       |

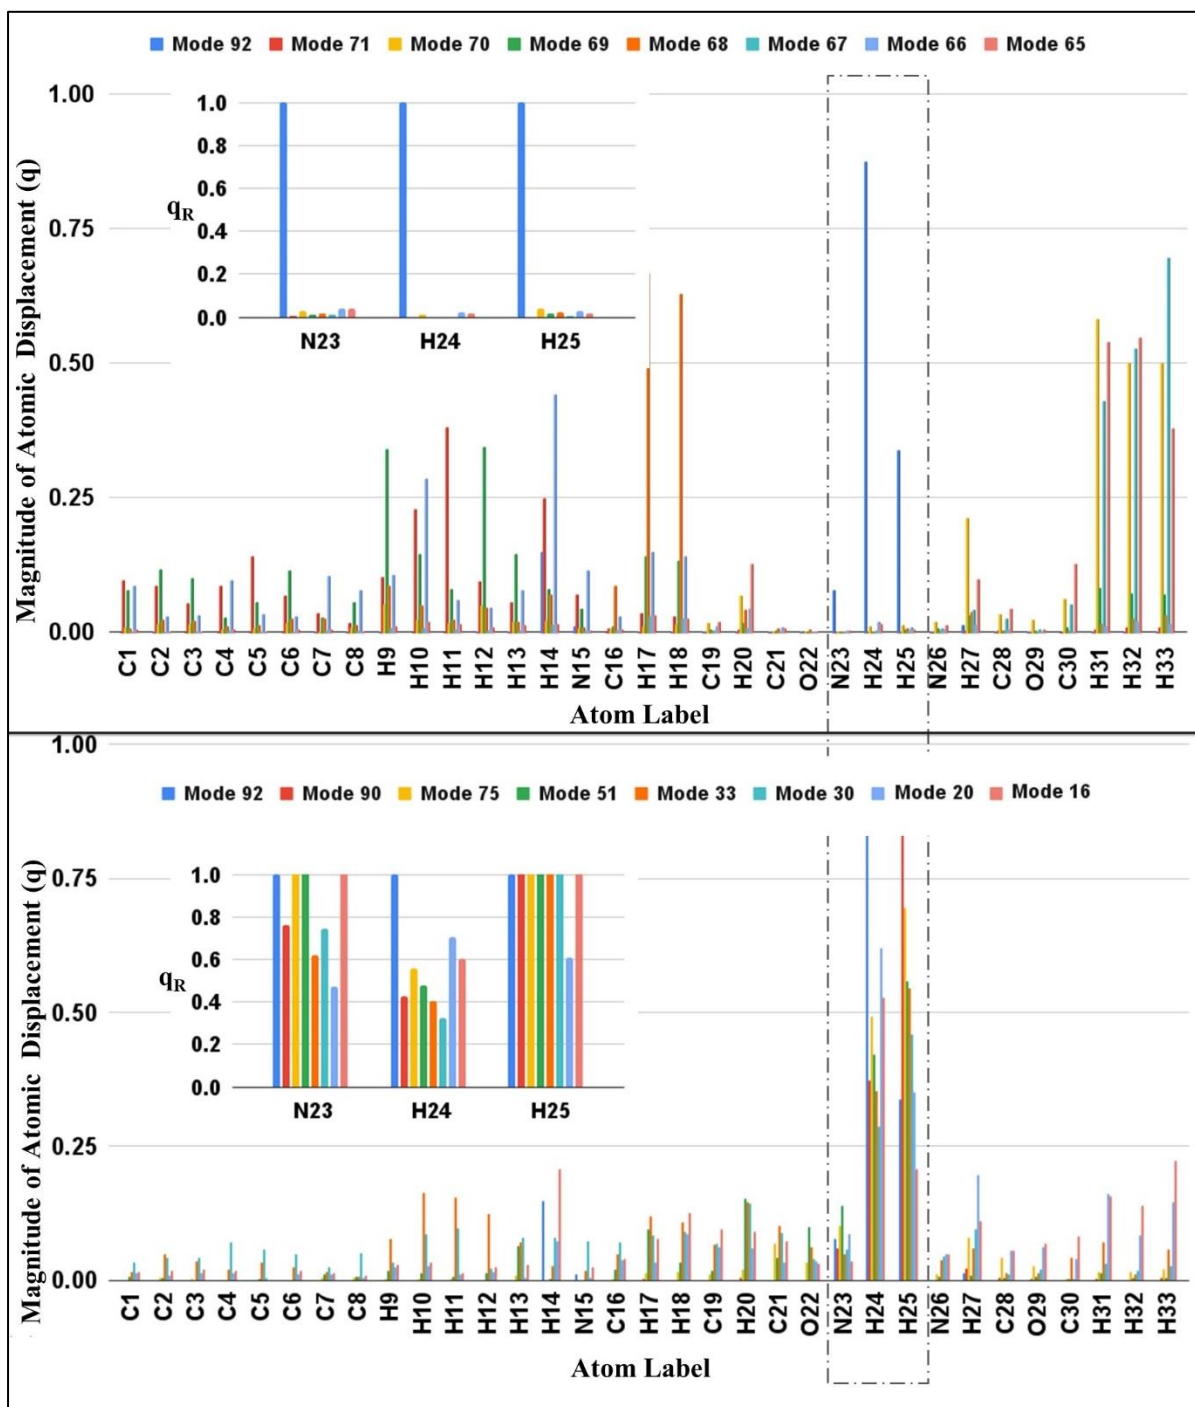

**Figure S9a.** Normal mode analysis of Anti-symmetric  $\text{NH}_2$  stretching (Mode 92) of NATA. The upper and lower panels represent some weakly and strongly coupled normal modes, respectively, with N-H stretching. Displacements during different modes are given in different colors, where normal mode displacement of H24 atom is taken as reference.

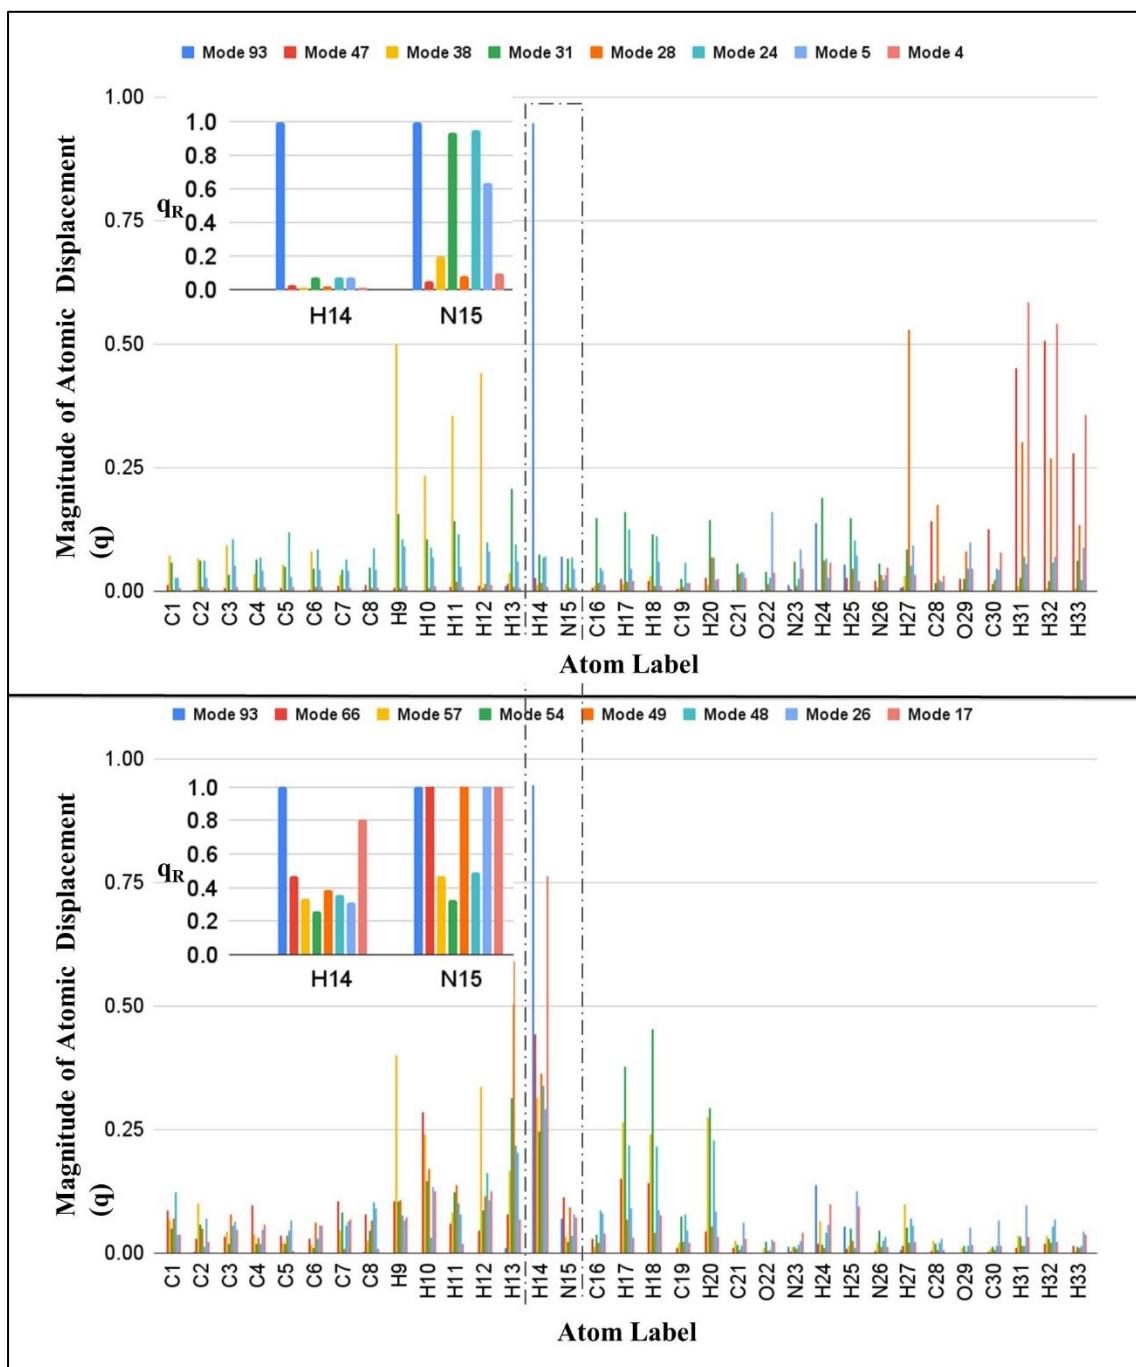

**Figure S9b.** Normal mode analysis of Indole N-H stretching (Mode 93) of NATA. The upper and lower panels represent some weakly and strongly coupled normal modes, respectively, with N-H stretching. Displacements during different modes are given in different colors, where normal mode displacement of H14 atom is taken as reference.

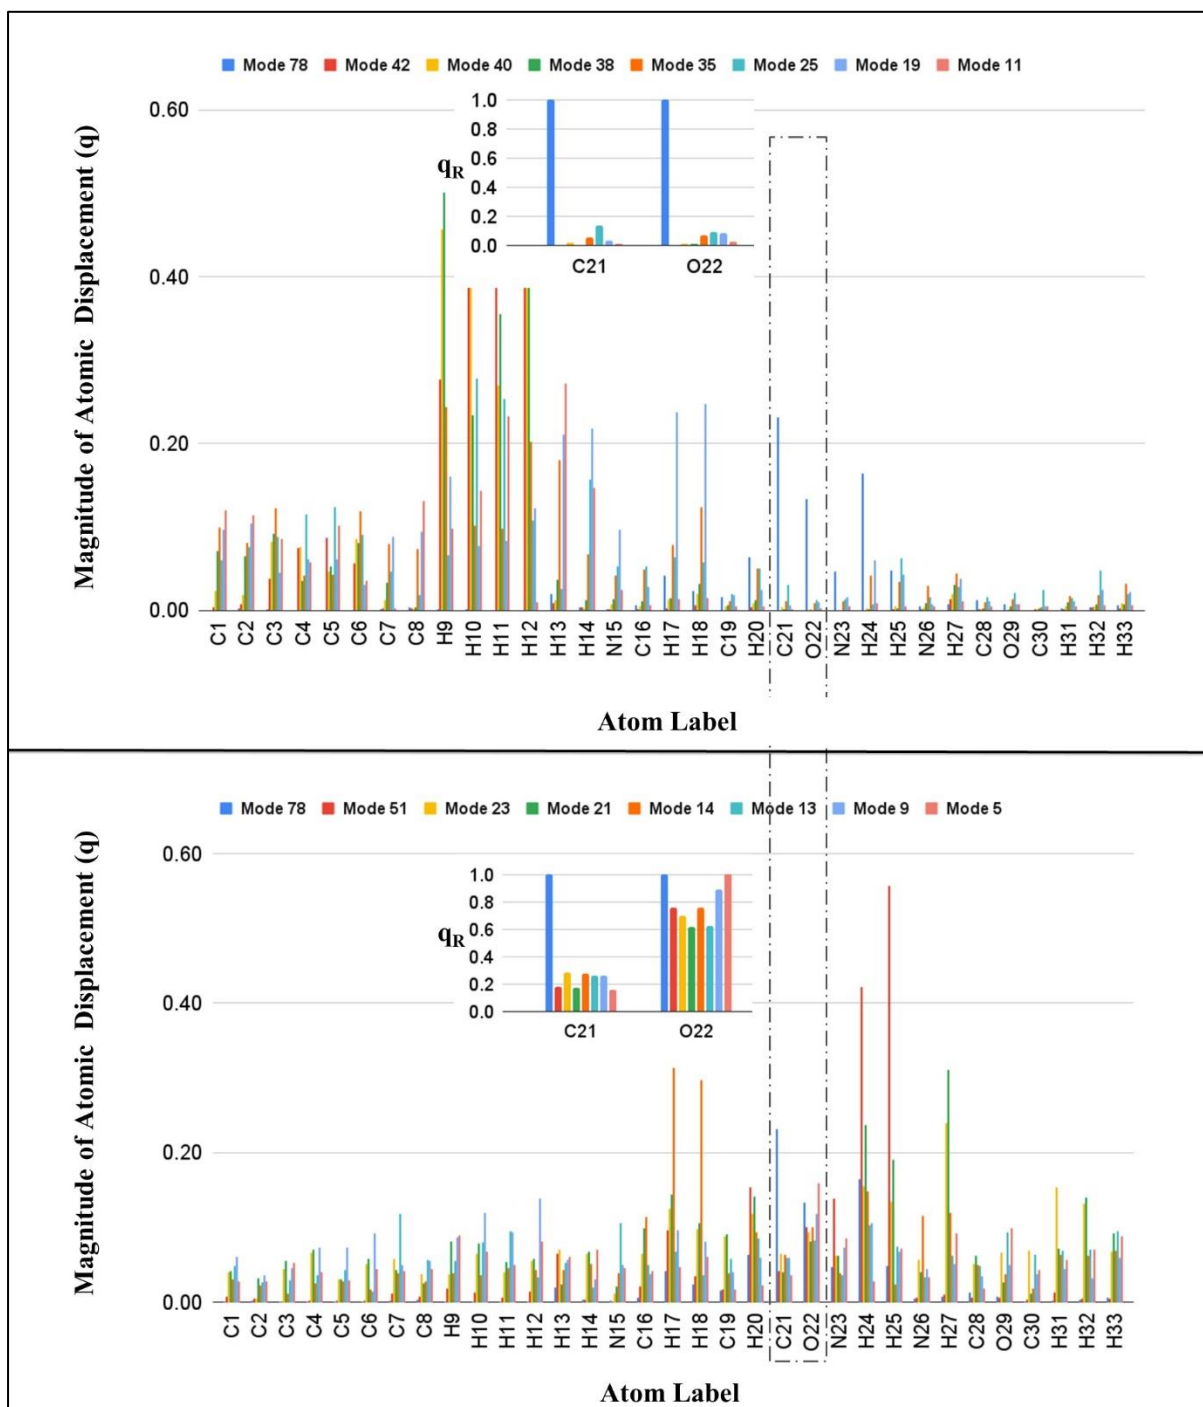

**Figure S9c.** Normal mode analysis of C=O stretching (Mode 78) of NATA. The upper and lower panels represent some weakly and strongly coupled normal modes, respectively, with C=O stretching. Displacements during different modes are given in different colors, where normal mode displacement of O22 atom is taken as reference.

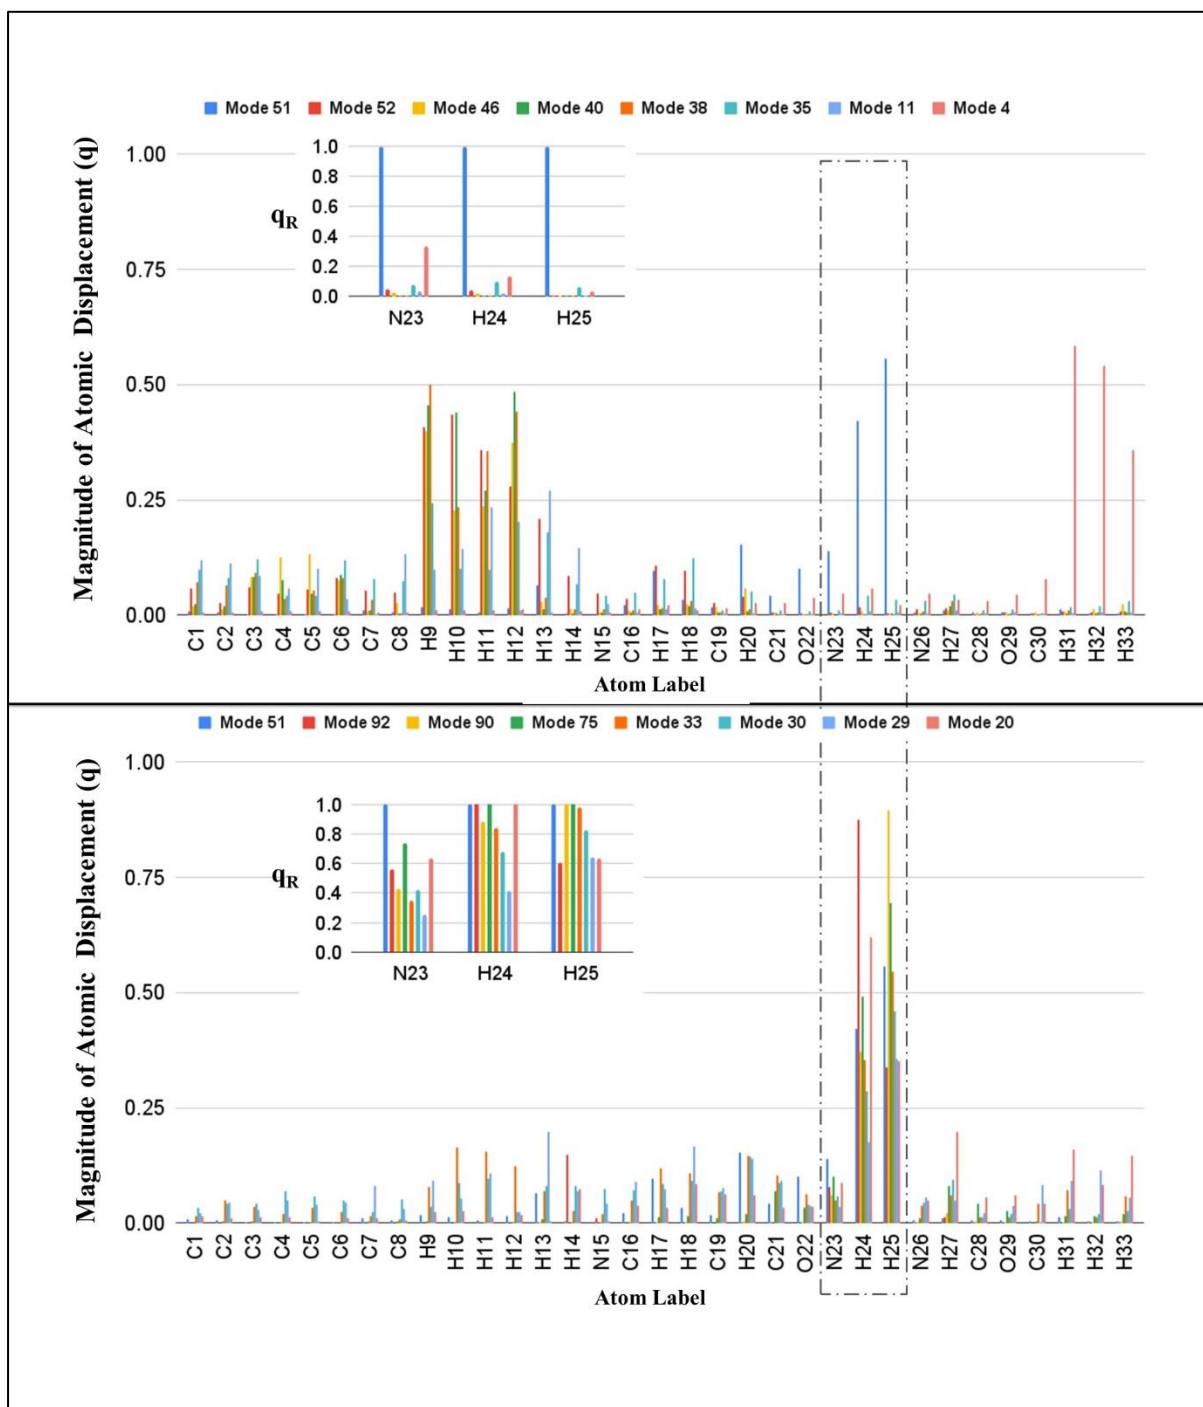

**Figure S9d.** Normal mode analysis of  $\text{NH}_2$  bending (Mode 51) of NATA. The upper and lower panels represent some weakly and strongly coupled normal modes, respectively, with  $\text{NH}_2$  bending. Displacements during different modes are given in different colors, where normal mode displacement of H25 atom is taken as reference.



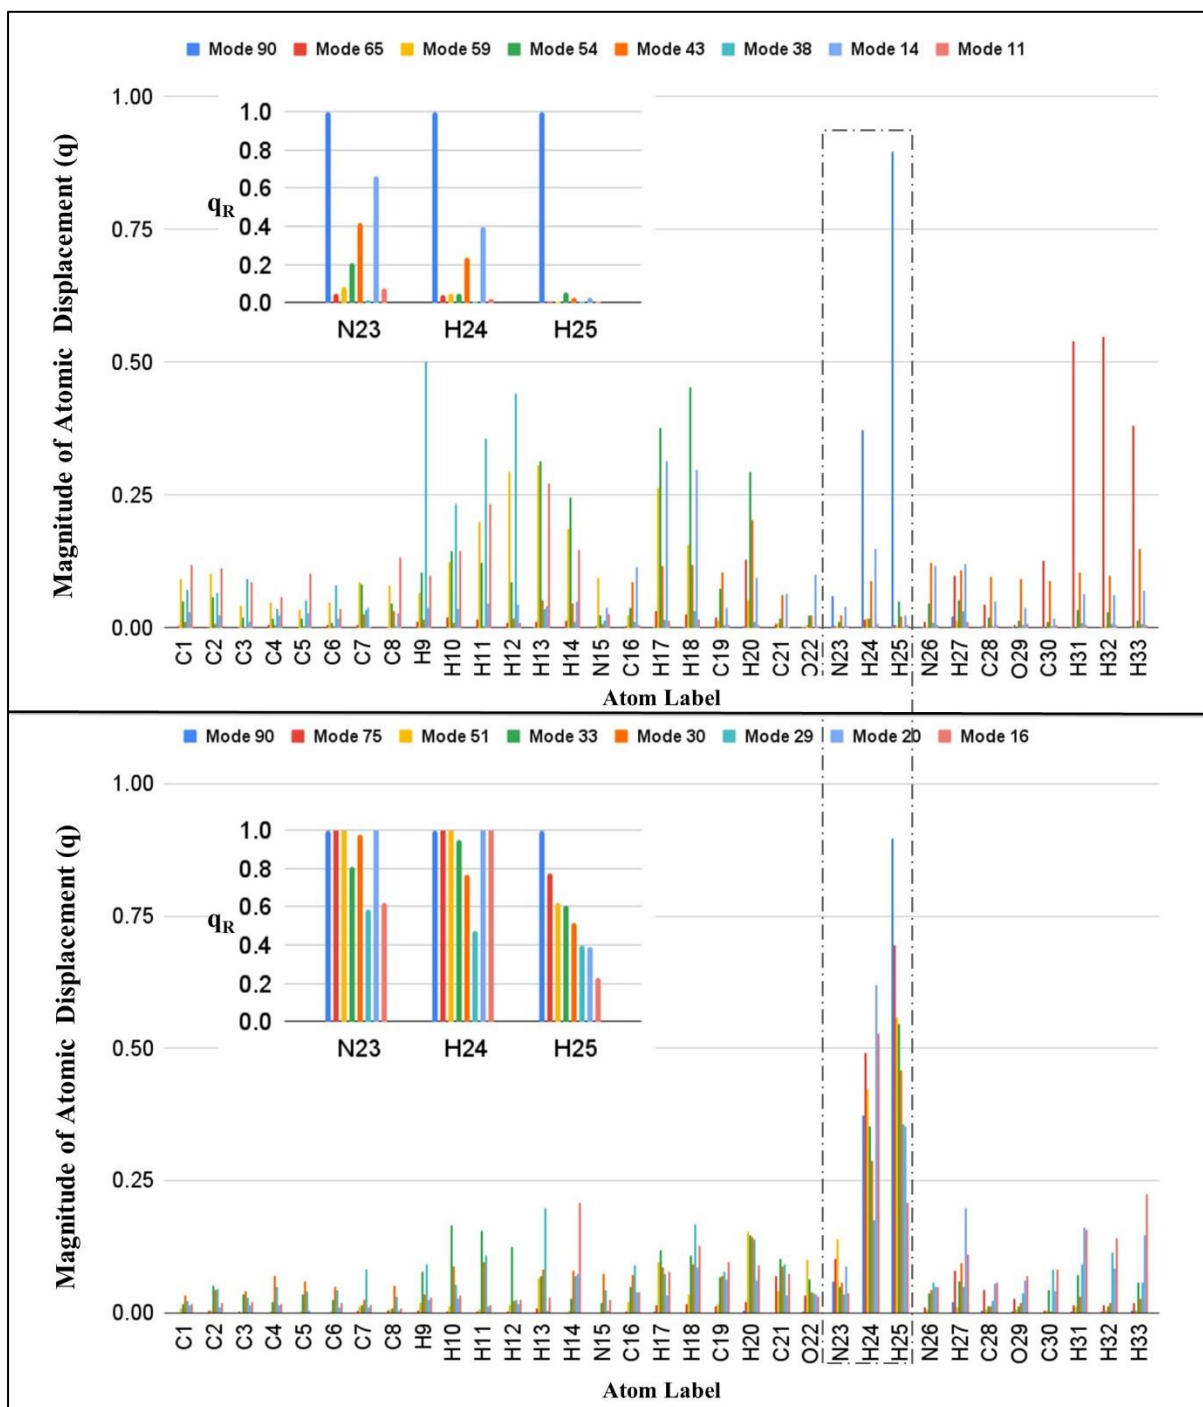

**Figure S9e.** Normal mode analysis of Symmetric N-H stretching (Mode 90) of NATA. The upper and lower panels represent some weakly and strongly coupled normal modes, respectively, with N-H stretching. Displacements during different modes are given in different colors, where normal mode displacement of H25 atom is taken as reference.

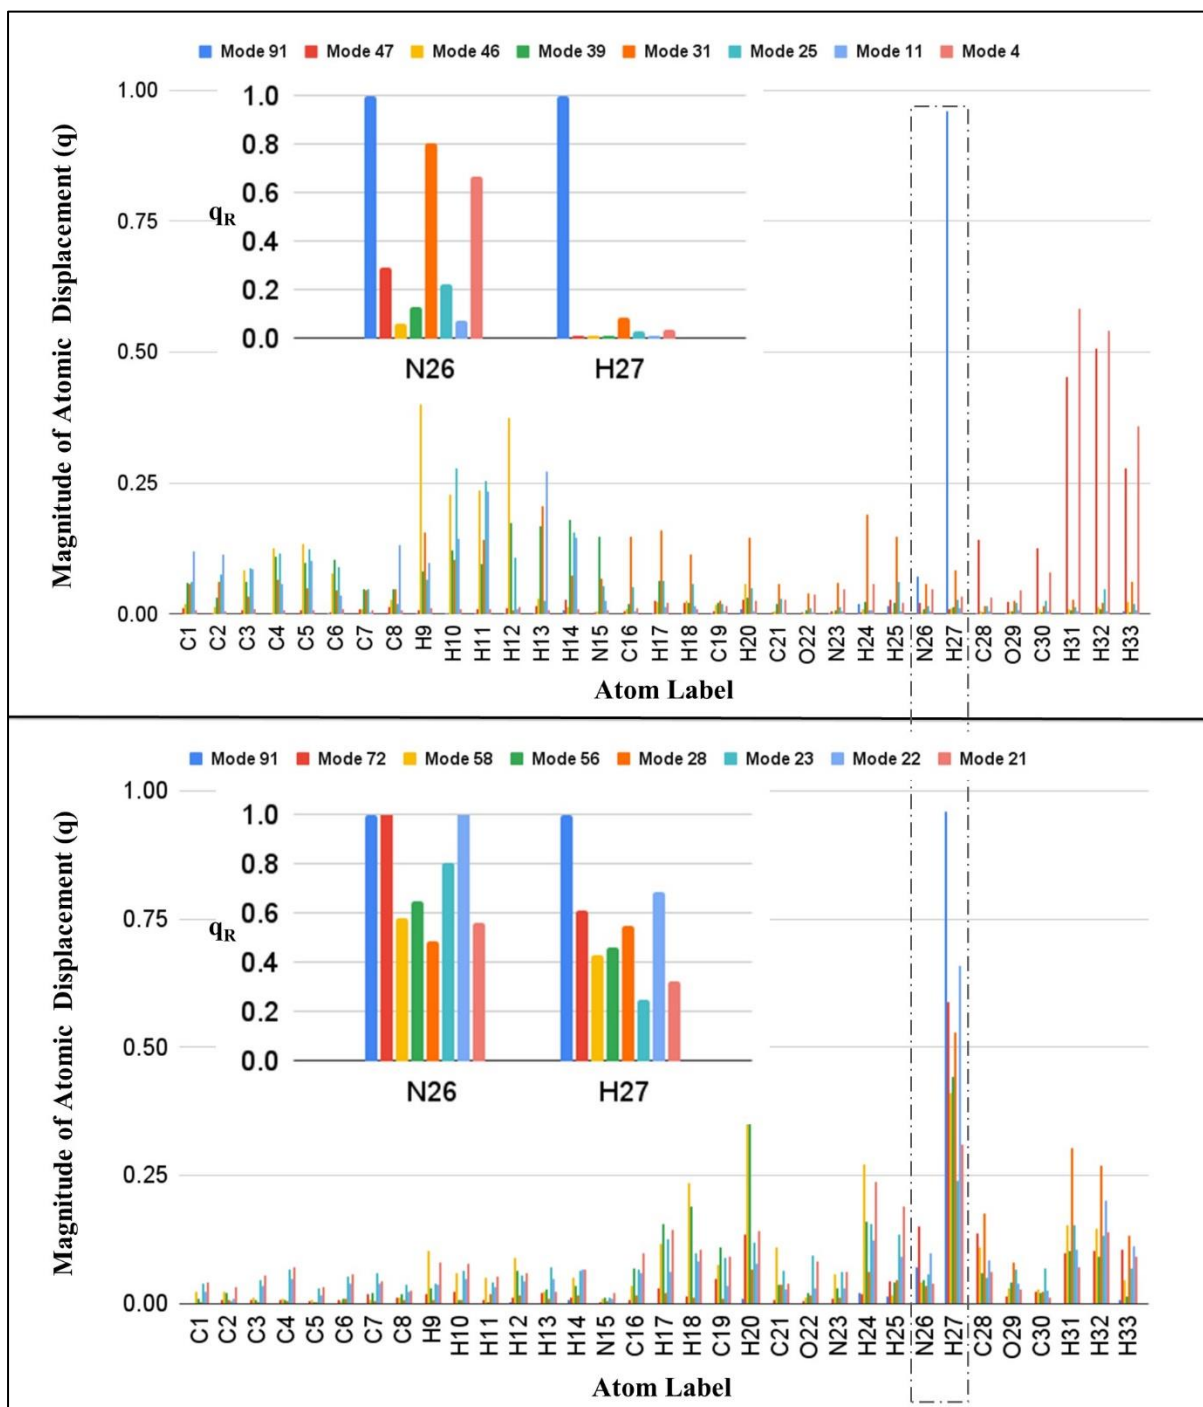

**Figure S9f.** Normal mode analysis of  $\phi$  N-H stretching (Mode 91) of NATA. The upper and lower panels represent some weakly and strongly coupled normal modes, respectively, with  $\phi$  N-H stretching. Displacements during different modes are given in different colors, where normal mode displacement of H27 atom is taken as reference.
